# Supplementary material for: Identification and Validation of Prognostic Biomarkers Specifically Expressed in Macrophage in IgA Nephropathy Patients Based on Integrated Bioinformatics Analyses
Source: Front Mol Biosci. 2022 May 5;9:884588. doi: 10.3389/fmolb.2022.884588 (PMC9117719; doi:10.3389/fmolb.2022.884588)
Supplement: Supplementary file 1 [file Table2.XLSX]

## Sheet: Sheet1
Results of GO enrichment analysis in the IgAN-related and immune-involving module
GO ID	GO term	p-value	Adjusted p-value	Count of enriched genes	Genes symbol
GO:0002443	leukocyte mediated immunity	1.76247e-23	8.30653e-20	70	IGKC/IGHM/PLCG2/CXCL6/C1QB/CX3CR1/C3/IL1B/TYROBP/CRTAM/C7/C1QA/ADGRE2/FCER1G/ITGAM/C1QC/ANXA3/SLAMF7/ITGB2/FGR/CLU/IL7R/CHGA/IGHV3-23/BTK/SASH3/CD1C/RAC2/FCGR2B/CLC/LYN/IGHV3-21/VAV1/CD1D/GAPT/TNFRSF1B/CD8A/IGHV4-28/TCIRG1/TNF/CORO1A/CD300A/LILRB1/RASGRP1/IL4I1/TLR8/C1R/PTPRC/NOD2/PRAM1/PTPN6/IL12RB1/SYK/MILR1/CD1B/MSH2/ZBTB1/LILRB4/MYO1G/ARRB2/CD84/HAVCR2/PIK3CG/HLA-DOB/NCKAP1L/TRPM4/TREM1/VAMP8…
GO:0002274	myeloid leukocyte activation	2.01667e-20	3.46294e-17	46	PLCG2/CXCL6/CX3CR1/VSIG4/TYROBP/C1QA/ADGRE2/TLR1/FCER1G/ITGAM/C5AR1/ANXA3/TLR2/IL33/ITGB2/FGR/CLU/CHGA/DOCK2/PYCARD/DHRS2/BTK/RAC2/FCGR2B/LYN/CD300LF/WNT5A/TNF/CD300A/RASGRP1/CD2/PTPRC/PRAM1/TSLP/SYK/MILR1/LILRB4/CD84/HAVCR2/PIK3CG/LILRA2/LCP2/VAMP8/MYD88/CD33/CD200
GO:0002253	activation of immune response	2.2161e-20	3.46294e-17	60	IGKC/IGHM/PLCG2/C1QB/FCN3/C3/VSIG4/IL1B/TYROBP/C7/C1QA/FCN1/C3AR1/FPR3/FCER1G/HCK/CD5L/C5AR1/C1QC/LAPTM5/BLNK/MNDA/FGR/CFH/CLU/CFB/IGHV3-23/MICB/PYCARD/CFD/BTK/LPXN/FCGR2B/LYN/IGHV3-21/VAV1/MFAP4/IGHV4-28/VTCN1/CD300A/CFP/CD79B/C1R/PTPRC/NOD2/PRAM1/PTPN6/SYK/EZR/APPL2/LILRB4/MYO1G/LILRA2/PVRIG/NCKAP1L/LCP2/THEMIS2/CLEC7A/LCK/PAK3
GO:0042110	T cell activation	2.93905e-20	3.46294e-17	69	IGF1/VSIG4/IL1B/CRTAM/LILRB2/CD48/FCER1G/LCP1/SLAMF7/LAPTM5/CD44/ITGAL/IL7R/GPR18/MICB/DOCK2/CD86/PYCARD/TNFSF13B/SASH3/CD1C/RAC2/FCGR2B/CD24/CLC/GPR183/LYN/VAV1/CD1D/TNFRSF1B/CD8A/EOMES/TCIRG1/CD3D/VTCN1/CORO1A/CD300A/JAML/APBB1IP/LILRB1/RASGRP1/CLEC4A/CD2/IGFBP2/IL4I1/PTPRC/NOD2/RUNX3/PTPN6/CCL19/IL12RB1/SYK/CCL21/PAG1/PSMB10/ZBTB1/LILRB4/EBI3/CD3G/CD84/HAVCR2/PIK3CG/TNFAIP8L2/SIRPB1/HLA-DOB/NC…
GO:0002697	regulation of immune effector process	9.29902e-20	8.76526e-17	56	PLCG2/CXCL6/CX3CR1/C3/VSIG4/IL1B/TYROBP/CRTAM/CD36/ADGRE2/ITGAM/CD5L/LAPTM5/ITGB2/FGR/CFH/IL7R/SLAMF8/CD86/BTK/SASH3/CD1C/RAC2/FCGR2B/CLC/LYN/VAV1/CD1D/TNFRSF1B/WNT5A/TNF/CD300A/LILRB1/RASGRP1/IL4I1/PTPRC/NOD2/PRAM1/PTPN6/CCL19/IL12RB1/SYK/CD1B/APPL2/TGFB3/MSH2/ZBTB1/LILRB4/ARRB2/CD84/HAVCR2/NCKAP1L/TRPM4/VAMP8/CLEC7A/GPI
GO:0002703	regulation of leukocyte mediated immunity	1.45296e-18	1.1413e-15	44	PLCG2/CXCL6/CX3CR1/C3/IL1B/TYROBP/CRTAM/ADGRE2/ITGAM/ITGB2/FGR/IL7R/BTK/SASH3/CD1C/RAC2/FCGR2B/CLC/LYN/VAV1/CD1D/TNFRSF1B/TNF/CD300A/LILRB1/RASGRP1/IL4I1/PTPRC/NOD2/PRAM1/PTPN6/IL12RB1/SYK/CD1B/MSH2/ZBTB1/LILRB4/ARRB2/CD84/HAVCR2/NCKAP1L/TRPM4/VAMP8/CLEC7A
GO:0070661	leukocyte proliferation	3.15596e-18	2.12486e-15	52	IGF1/VSIG4/IL1B/TYROBP/CRTAM/CSF1R/LILRB2/CCL8/IL33/MNDA/LST1/CLU/IL7R/DOCK2/CD86/PYCARD/BTK/TNFSF13B/SASH3/RAC2/FCGR2B/CD24/CLC/GPR183/LYN/CD1D/GAPT/TNFRSF1B/TCIRG1/VTCN1/CORO1A/CD300A/LILRB1/RASGRP1/IGFBP2/IL4I1/BST1/CD180/PTPRC/FLT3/PTPN6/CCL19/IL12RB1/SYK/PSMB10/LILRB4/EBI3/HAVCR2/PIK3CG/NCKAP1L/MYD88/IMPDH2
GO:0006909	phagocytosis	3.87707e-18	2.28408e-15	51	IGKC/IGHM/PLCG2/FCN3/C3/IL1B/TYROBP/CD36/FCN1/NCF2/FCER1G/ITGAM/CD14/HCK/ANXA3/IRF8/TLR2/ITGB2/FGR/ITGAL/IGHV3-23/DOCK2/PYCARD/RAC2/MARCO/FCGR2B/LYN/IGHV3-21/VAV1/XKR4/CD300LF/IL2RG/IGHV4-28/TNF/CORO1A/CD300A/PTPRC/NOD2/AXL/SYK/APPL2/MYO1G/NCF4/BIN2/RHOG/SIRPB1/CORO1C/MFGE8/NCKAP1L/CLEC7A/MYD88
GO:0002366	leukocyte activation involved in immune response	2.27997e-17	1.1341e-14	47	PLCG2/CX3CR1/TYROBP/ADGRE2/FCER1G/ITGAM/LCP1/ANXA3/IRF8/ITGB2/FGR/ITGAL/CHGA/DOCK2/CD86/PYCARD/BTK/CD1C/RAC2/DOCK11/FCGR2B/GPR183/LYN/GAPT/EOMES/CORO1A/CD300A/APBB1IP/LILRB1/RASGRP1/CD180/PTPRC/PRAM1/CCL19/CDH17/IL12RB1/SYK/MILR1/MSH2/CD84/HAVCR2/PIK3CG/LILRA2/NCKAP1L/VAMP8/CLEC7A/MYD88
GO:0050900	leukocyte migration	2.40633e-17	1.1341e-14	55	CCL4/PPBP/CXCL6/CX3CR1/CRTAM/CSF1R/PLA2G7/CCL8/C3AR1/ADGRE2/PF4/FCER1G/HCK/CCR1/C5AR1/ITGB2/SELP/ITGAL/GPR18/CHGA/SLAMF8/CXCR4/PYCARD/MMP9/RAC2/GPR183/LYN/VAV1/CCR5/EMILIN1/WNT5A/TNF/CORO1A/CD300A/JAML/BST1/NOD2/CCL19/SYK/CCL21/CCL11/ITGA4/MYO1G/PIK3CG/RHOG/ALOX5/CCL24/PLVAP/NCKAP1L/TRPM4/TREM1/MYD88/CD200/LCK/CKLF
GO:0002263	cell activation involved in immune response	4.11868e-17	1.76467e-14	47	PLCG2/CX3CR1/TYROBP/ADGRE2/FCER1G/ITGAM/LCP1/ANXA3/IRF8/ITGB2/FGR/ITGAL/CHGA/DOCK2/CD86/PYCARD/BTK/CD1C/RAC2/DOCK11/FCGR2B/GPR183/LYN/GAPT/EOMES/CORO1A/CD300A/APBB1IP/LILRB1/RASGRP1/CD180/PTPRC/PRAM1/CCL19/CDH17/IL12RB1/SYK/MILR1/MSH2/CD84/HAVCR2/PIK3CG/LILRA2/NCKAP1L/VAMP8/CLEC7A/MYD88
GO:0050867	positive regulation of cell activation	1.15924e-16	4.55292e-14	58	IGKC/IGHM/IGF1/IL1B/TYROBP/LILRB2/ITGAM/PLEK/IL33/ITGB2/SELP/FGR/IL7R/IGHV3-23/CD86/PYCARD/BTK/TNFSF13B/SASH3/CD24/GPR183/LYN/IGHV3-21/VAV1/CD1D/WNT5A/IGHV4-28/VTCN1/CORO1A/LILRB1/RASGRP1/CD2/IGFBP2/IL4I1/BST1/PTPRC/NOD2/RUNX3/PTPN6/TSLP/CCL19/AXL/IL12RB1/SYK/CCL21/MSH2/ZBTB1/LILRB4/EBI3/HAVCR2/LILRA2/SIRPB1/HLA-DOB/NCKAP1L/VAMP8/CLEC7A/MYD88/LCK
GO:0007159	leukocyte cell-cell adhesion	1.36759e-16	4.95803e-14	54	CX3CR1/IGF1/VSIG4/IL1B/CRTAM/LILRB2/LAPTM5/ITGB2/SELP/CD44/ITGAL/IL7R/CD86/PYCARD/TNFSF13B/SASH3/RAC2/OLR1/FCGR2B/CD24/LYN/VAV1/CD1D/TNF/VTCN1/CORO1A/CD300A/LILRB1/RASGRP1/IGFBP2/IL4I1/PTPRC/NOD2/RUNX3/PTPN6/CCL19/IL12RB1/SYK/EZR/CCL21/PAG1/ITGA4/ZBTB1/LILRB4/EBI3/HAVCR2/TNFAIP8L2/SIRPB1/ALOX5/HLA-DOB/IRAK1/BMP7/NCKAP1L/LCK
GO:0046651	lymphocyte proliferation	1.49437e-16	5.03067e-14	47	IGF1/VSIG4/IL1B/TYROBP/CRTAM/LILRB2/MNDA/LST1/IL7R/DOCK2/CD86/PYCARD/BTK/TNFSF13B/SASH3/RAC2/FCGR2B/CD24/CLC/GPR183/LYN/CD1D/GAPT/TNFRSF1B/VTCN1/CORO1A/CD300A/LILRB1/RASGRP1/IGFBP2/IL4I1/BST1/CD180/PTPRC/FLT3/PTPN6/CCL19/IL12RB1/SYK/PSMB10/LILRB4/EBI3/HAVCR2/PIK3CG/NCKAP1L/MYD88/IMPDH2
GO:0032943	mononuclear cell proliferation	2.26808e-16	7.12631e-14	47	IGF1/VSIG4/IL1B/TYROBP/CRTAM/LILRB2/MNDA/LST1/IL7R/DOCK2/CD86/PYCARD/BTK/TNFSF13B/SASH3/RAC2/FCGR2B/CD24/CLC/GPR183/LYN/CD1D/GAPT/TNFRSF1B/VTCN1/CORO1A/CD300A/LILRB1/RASGRP1/IGFBP2/IL4I1/BST1/CD180/PTPRC/FLT3/PTPN6/CCL19/IL12RB1/SYK/PSMB10/LILRB4/EBI3/HAVCR2/PIK3CG/NCKAP1L/MYD88/IMPDH2
GO:0022409	positive regulation of cell-cell adhesion	4.26195e-16	1.25541e-13	46	IGF1/IL1B/LILRB2/ITGB2/SELP/CD44/IL7R/CD86/PYCARD/TNFSF13B/SASH3/CD24/LYN/VAV1/CD1D/CITED2/WNT5A/TNF/VTCN1/CORO1A/LILRB1/RASGRP1/IGFBP2/IL4I1/PTPRC/NOD2/RUNX3/PTPN6/CCL19/IL12RB1/SYK/PLAUR/CCL21/ITGA4/ZBTB1/FSTL3/LILRB4/EBI3/HAVCR2/SIRPB1/ALOX5/HLA-DOB/IRAK1/BMP7/NCKAP1L/LCK
GO:0002275	myeloid cell activation involved in immune response	9.91635e-16	2.74916e-13	26	PLCG2/CX3CR1/TYROBP/ADGRE2/FCER1G/ITGAM/ANXA3/ITGB2/FGR/CHGA/DOCK2/PYCARD/BTK/RAC2/LYN/CD300A/RASGRP1/PRAM1/SYK/MILR1/CD84/HAVCR2/PIK3CG/LILRA2/VAMP8/MYD88
GO:0002764	immune response-regulating signaling pathway	1.13643e-15	2.97555e-13	60	IGKC/IGHM/PLCG2/TYROBP/LILRB2/CD36/FCN1/C3AR1/FPR3/TLR1/FCER1G/CD14/HCK/C5AR1/CTSS/LAPTM5/BLNK/TLR2/MNDA/FGR/IGHV3-23/MICB/LY96/BTK/LPXN/FCGR2B/CD24/LYN/IGHV3-21/VAV1/CD300LF/IGHV4-28/VTCN1/CD300A/LILRB1/CD79B/TLR8/PTPRC/NOD2/PRAM1/PIK3AP1/PTPN6/SYK/EZR/APPL2/LILRB4/MYO1G/ARRB2/HAVCR2/LILRA2/PVRIG/IRAK1/NCKAP1L/LCP2/THEMIS2/CLEC7A/MYD88/CD33/LCK/PAK3
GO:0022407	regulation of cell-cell adhesion	2.24035e-15	5.32337e-13	58	IGF1/VSIG4/IL1B/CRTAM/LILRB2/LAPTM5/ITGB2/FXYD5/SELP/CD44/IL7R/CD86/PYCARD/TNFSF13B/SASH3/FCGR2B/CD24/LYN/VAV1/CD1D/CITED2/WNT5A/TNF/VTCN1/CORO1A/CD300A/LILRB1/RASGRP1/IGFBP2/IL4I1/IL1RN/PTPRC/NOD2/RUNX3/PTPN6/CCL19/IL12RB1/SYK/PLAUR/CCL21/PAG1/ITGA4/ZBTB1/FSTL3/LILRB4/EBI3/HAVCR2/TNFAIP8L2/SIRPB1/ALOX5/HLA-DOB/EPB41L5/EPHA7/IRAK1/BMP7/NCKAP1L/ALOX12/LCK
GO:1903039	positive regulation of leukocyte cell-cell adhesion	2.28731e-15	5.32337e-13	41	IGF1/IL1B/LILRB2/ITGB2/SELP/CD44/IL7R/CD86/PYCARD/TNFSF13B/SASH3/CD24/LYN/VAV1/CD1D/TNF/VTCN1/CORO1A/LILRB1/RASGRP1/IGFBP2/IL4I1/PTPRC/NOD2/RUNX3/PTPN6/CCL19/IL12RB1/SYK/CCL21/ITGA4/ZBTB1/LILRB4/EBI3/HAVCR2/SIRPB1/ALOX5/HLA-DOB/IRAK1/NCKAP1L/LCK
GO:0002696	positive regulation of leukocyte activation	2.37197e-15	5.32337e-13	55	IGKC/IGHM/IGF1/IL1B/TYROBP/LILRB2/ITGAM/IL33/ITGB2/FGR/IL7R/IGHV3-23/CD86/PYCARD/BTK/TNFSF13B/SASH3/CD24/GPR183/LYN/IGHV3-21/VAV1/CD1D/WNT5A/IGHV4-28/VTCN1/CORO1A/LILRB1/RASGRP1/CD2/IGFBP2/IL4I1/BST1/PTPRC/NOD2/RUNX3/PTPN6/TSLP/CCL19/AXL/IL12RB1/SYK/CCL21/MSH2/ZBTB1/LILRB4/EBI3/HAVCR2/SIRPB1/HLA-DOB/NCKAP1L/VAMP8/CLEC7A/MYD88/LCK
GO:0001819	positive regulation of cytokine production	3.88463e-15	8.32193e-13	59	LUM/PLCG2/C3/IL1B/CYBB/TYROBP/CRTAM/CSF1R/LILRB2/CD36/FCN1/C3AR1/PF4/TLR1/FCER1G/CD14/C5AR1/LAPTM5/IRF8/TLR2/IL33/MNDA/FGR/CLU/CD86/PYCARD/LY96/PTGS2/SASH3/LTB/ADRA2A/WNT5A/TNF/VTCN1/MMP12/LILRB1/GBP5/RASGRP1/CD2/TLR8/PTPRC/NOD2/TSLP/CCL19/CASP1/IL12RB1/SYK/NLRP2/EBI3/CD84/HAVCR2/HPSE/PIK3CG/LILRA2/IRAK1/CLEC7A/MYD88/KAT2A/CD200
GO:0070663	regulation of leukocyte proliferation	5.53815e-15	1.13484e-12	41	IGF1/VSIG4/IL1B/TYROBP/CRTAM/CSF1R/LILRB2/CCL8/IL33/MNDA/LST1/CD86/PYCARD/BTK/TNFSF13B/SASH3/RAC2/FCGR2B/CD24/CLC/GPR183/LYN/CD1D/TNFRSF1B/VTCN1/CORO1A/CD300A/LILRB1/IGFBP2/IL4I1/BST1/PTPRC/PTPN6/CCL19/IL12RB1/SYK/LILRB4/EBI3/HAVCR2/NCKAP1L/MYD88
GO:0045785	positive regulation of cell adhesion	1.08514e-14	2.13094e-12	56	IGF1/IL1B/SFRP2/FN1/LILRB2/CD36/ITGB2/SELP/CD44/IL7R/CD86/PYCARD/TNFSF13B/SASH3/CD24/LYN/VAV1/CD1D/EMILIN1/CITED2/COL16A1/WNT5A/TNF/VTCN1/CORO1A/APBB1IP/LILRB1/RASGRP1/IGFBP2/IL4I1/PTPRC/NOD2/RUNX3/PTPN6/CCL19/IL12RB1/SYK/PLAUR/CCL21/ITGA4/ZBTB1/FSTL3/LILRB4/EBI3/HAVCR2/TPM1/SIRPB1/ALOX5/HLA-DOB/EPB41L5/EPHA4/IRAK1/BMP7/NCKAP1L/LCK/AGR2
GO:1903037	regulation of leukocyte cell-cell adhesion	1.46963e-14	2.57746e-12	48	IGF1/VSIG4/IL1B/CRTAM/LILRB2/LAPTM5/ITGB2/SELP/CD44/IL7R/CD86/PYCARD/TNFSF13B/SASH3/FCGR2B/CD24/LYN/VAV1/CD1D/TNF/VTCN1/CORO1A/CD300A/LILRB1/RASGRP1/IGFBP2/IL4I1/PTPRC/NOD2/RUNX3/PTPN6/CCL19/IL12RB1/SYK/CCL21/PAG1/ITGA4/ZBTB1/LILRB4/EBI3/HAVCR2/TNFAIP8L2/SIRPB1/ALOX5/HLA-DOB/IRAK1/NCKAP1L/LCK
GO:0071706	tumor necrosis factor superfamily cytokine production	1.47658e-14	2.57746e-12	35	PLCG2/CX3CR1/IGF1/CYBB/TYROBP/CD36/PF4/TLR1/CD14/TLR2/IL33/CLU/GPR18/CD86/PYCARD/LY96/SASH3/WNT5A/LILRB1/RASGRP1/CLEC4A/CD2/PTPRC/NOD2/PTPN6/CCL19/AXL/SYK/ARRB2/CD84/HAVCR2/LILRA2/CLEC7A/MYD88/CD33
GO:1903555	regulation of tumor necrosis factor superfamily cytokine production	1.47658e-14	2.57746e-12	35	PLCG2/CX3CR1/IGF1/CYBB/TYROBP/CD36/PF4/TLR1/CD14/TLR2/IL33/CLU/GPR18/CD86/PYCARD/LY96/SASH3/WNT5A/LILRB1/RASGRP1/CLEC4A/CD2/PTPRC/NOD2/PTPN6/CCL19/AXL/SYK/ARRB2/CD84/HAVCR2/LILRA2/CLEC7A/MYD88/CD33
GO:0030595	leukocyte chemotaxis	1.65261e-14	2.78169e-12	39	CCL4/PPBP/CXCL6/CX3CR1/CSF1R/PLA2G7/CCL8/C3AR1/ADGRE2/PF4/FCER1G/CCR1/C5AR1/ITGB2/GPR18/CHGA/SLAMF8/CXCR4/RAC2/GPR183/LYN/VAV1/CCR5/WNT5A/CORO1A/JAML/BST1/NOD2/CCL19/SYK/CCL21/CCL11/PIK3CG/ALOX5/CCL24/NCKAP1L/TRPM4/TREM1/CKLF
GO:0002449	lymphocyte mediated immunity	1.72624e-14	2.80544e-12	49	IGKC/IGHM/C1QB/C3/IL1B/CRTAM/C7/C1QA/FCER1G/C1QC/SLAMF7/CLU/IL7R/IGHV3-23/BTK/SASH3/CD1C/FCGR2B/CLC/IGHV3-21/VAV1/CD1D/GAPT/TNFRSF1B/CD8A/IGHV4-28/TCIRG1/TNF/CORO1A/LILRB1/RASGRP1/IL4I1/TLR8/C1R/PTPRC/NOD2/PTPN6/IL12RB1/CD1B/MSH2/ZBTB1/LILRB4/MYO1G/ARRB2/HAVCR2/HLA-DOB/NCKAP1L/TRPM4/MYD88
GO:0019221	cytokine-mediated signaling pathway	2.30078e-14	3.61453e-12	58	CCL4/PPBP/CXCL6/CX3CR1/IL1B/CSF2RB/CSF1R/LILRB2/IL10RA/CCL8/PF4/FCER1G/HCK/CCR1/LAPTM5/IL33/CCDC3/CD44/IL7R/CXCR4/PYCARD/TNFSF13B/LILRA1/CD24/CCR5/CD300LF/TNFRSF1B/IL2RG/WNT5A/SAMHD1/TNF/NLRC5/MMP12/LILRB1/IL1RN/PTPRC/FLT3/PTPN6/TSLP/CCL19/AXL/CASP1/IL12RB1/SYK/CCL21/APPL2/CCL11/LILRB4/EBI3/LILRA2/CRLF1/CCL24/IRAK1/PLVAP/TNFRSF17/MYD88/LILRB3/TTLL12
GO:0002683	negative regulation of immune system process	3.04059e-14	4.62268e-12	55	CX3CR1/VSIG4/TYROBP/CRTAM/LILRB2/HCK/C1QC/LAPTM5/MNDA/LST1/FGR/IL7R/GPR18/SLAMF8/MICB/CD86/BTK/LPXN/FCGR2B/LYN/SAMSN1/EMILIN1/CD300LF/SAMHD1/TNF/NLRC5/VTCN1/MMP12/CD300A/LILRB1/IL4I1/PTPRC/NOD2/RUNX3/PTPN6/AXL/SYK/EZR/MILR1/CCL21/PAG1/TGFB3/FSTL3/LILRB4/ARRB2/CD84/HAVCR2/TNFAIP8L2/HLA-DOB/PVRIG/TBC1D10C/NCKAP1L/LILRB3/TTLL12/CD200
GO:0032640	tumor necrosis factor production	3.72035e-14	5.31333e-12	34	PLCG2/CX3CR1/IGF1/CYBB/TYROBP/CD36/PF4/TLR1/CD14/TLR2/IL33/CLU/GPR18/PYCARD/LY96/SASH3/WNT5A/LILRB1/RASGRP1/CLEC4A/CD2/PTPRC/NOD2/PTPN6/CCL19/AXL/SYK/ARRB2/CD84/HAVCR2/LILRA2/CLEC7A/MYD88/CD33
GO:0032680	regulation of tumor necrosis factor production	3.72035e-14	5.31333e-12	34	PLCG2/CX3CR1/IGF1/CYBB/TYROBP/CD36/PF4/TLR1/CD14/TLR2/IL33/CLU/GPR18/PYCARD/LY96/SASH3/WNT5A/LILRB1/RASGRP1/CLEC4A/CD2/PTPRC/NOD2/PTPN6/CCL19/AXL/SYK/ARRB2/CD84/HAVCR2/LILRA2/CLEC7A/MYD88/CD33
GO:0050670	regulation of lymphocyte proliferation	4.11414e-14	5.70292e-12	38	IGF1/VSIG4/IL1B/TYROBP/CRTAM/LILRB2/MNDA/LST1/CD86/PYCARD/BTK/TNFSF13B/SASH3/RAC2/FCGR2B/CD24/CLC/GPR183/LYN/CD1D/TNFRSF1B/VTCN1/CORO1A/CD300A/LILRB1/IGFBP2/IL4I1/BST1/PTPRC/PTPN6/CCL19/IL12RB1/SYK/LILRB4/EBI3/HAVCR2/NCKAP1L/MYD88
GO:0032944	regulation of mononuclear cell proliferation	5.50667e-14	7.28156e-12	38	IGF1/VSIG4/IL1B/TYROBP/CRTAM/LILRB2/MNDA/LST1/CD86/PYCARD/BTK/TNFSF13B/SASH3/RAC2/FCGR2B/CD24/CLC/GPR183/LYN/CD1D/TNFRSF1B/VTCN1/CORO1A/CD300A/LILRB1/IGFBP2/IL4I1/BST1/PTPRC/PTPN6/CCL19/IL12RB1/SYK/LILRB4/EBI3/HAVCR2/NCKAP1L/MYD88
GO:0060326	cell chemotaxis	5.56198e-14	7.28156e-12	45	CCL4/PPBP/CXCL6/CX3CR1/CSF1R/PLA2G7/CCL8/C3AR1/ADGRE2/PF4/FCER1G/SMOC2/CCR1/C5AR1/ITGB2/GPR18/CHGA/SLAMF8/CXCR4/RAC2/GPR183/LYN/VAV1/CCR5/WNT5A/CORO1A/JAML/LPAR1/BST1/NOD2/CCL19/SYK/CCL21/CCL11/ARRB2/PIK3CG/BIN2/RHOG/ALOX5/CCL24/PRKD1/NCKAP1L/TRPM4/TREM1/CKLF
GO:1903557	positive regulation of tumor necrosis factor superfamily cytokine production	6.98195e-14	8.89349e-12	26	PLCG2/CYBB/TYROBP/CD36/PF4/TLR1/CD14/TLR2/IL33/CLU/CD86/PYCARD/LY96/SASH3/WNT5A/RASGRP1/CD2/PTPRC/NOD2/CCL19/SYK/CD84/HAVCR2/LILRA2/CLEC7A/MYD88
GO:0002768	immune response-regulating cell surface receptor signaling pathway	1.00039e-13	1.24075e-11	45	IGKC/IGHM/PLCG2/TYROBP/LILRB2/FCN1/C3AR1/FPR3/FCER1G/HCK/C5AR1/LAPTM5/BLNK/MNDA/FGR/IGHV3-23/MICB/BTK/LPXN/FCGR2B/CD24/LYN/IGHV3-21/VAV1/IGHV4-28/VTCN1/CD300A/LILRB1/CD79B/PTPRC/PRAM1/PTPN6/SYK/EZR/APPL2/LILRB4/MYO1G/LILRA2/PVRIG/NCKAP1L/LCP2/THEMIS2/CLEC7A/LCK/PAK3
GO:0050863	regulation of T cell activation	1.17564e-13	1.42071e-11	46	IGF1/VSIG4/IL1B/CRTAM/LILRB2/LAPTM5/IL7R/CD86/PYCARD/TNFSF13B/SASH3/RAC2/FCGR2B/CD24/CLC/LYN/VAV1/CD1D/TNFRSF1B/VTCN1/CORO1A/CD300A/LILRB1/RASGRP1/CD2/IGFBP2/IL4I1/PTPRC/NOD2/RUNX3/PTPN6/CCL19/IL12RB1/SYK/CCL21/PAG1/ZBTB1/LILRB4/EBI3/HAVCR2/TNFAIP8L2/SIRPB1/HLA-DOB/NCKAP1L/KAT2A/LCK
GO:0032760	positive regulation of tumor necrosis factor production	2.17595e-13	2.56382e-11	25	PLCG2/CYBB/TYROBP/CD36/PF4/TLR1/CD14/TLR2/IL33/CLU/PYCARD/LY96/SASH3/WNT5A/RASGRP1/CD2/PTPRC/NOD2/CCL19/SYK/CD84/HAVCR2/LILRA2/CLEC7A/MYD88
GO:0002429	immune response-activating cell surface receptor signaling pathway	4.77202e-13	5.35489e-11	42	IGKC/IGHM/PLCG2/TYROBP/FCN1/C3AR1/FPR3/FCER1G/HCK/C5AR1/LAPTM5/BLNK/MNDA/FGR/IGHV3-23/MICB/BTK/LPXN/FCGR2B/LYN/IGHV3-21/VAV1/IGHV4-28/VTCN1/CD300A/CD79B/PTPRC/PRAM1/PTPN6/SYK/EZR/APPL2/LILRB4/MYO1G/LILRA2/PVRIG/NCKAP1L/LCP2/THEMIS2/CLEC7A/LCK/PAK3
GO:0002757	immune response-activating signal transduction	4.77202e-13	5.35489e-11	42	IGKC/IGHM/PLCG2/TYROBP/FCN1/C3AR1/FPR3/FCER1G/HCK/C5AR1/LAPTM5/BLNK/MNDA/FGR/IGHV3-23/MICB/BTK/LPXN/FCGR2B/LYN/IGHV3-21/VAV1/IGHV4-28/VTCN1/CD300A/CD79B/PTPRC/PRAM1/PTPN6/SYK/EZR/APPL2/LILRB4/MYO1G/LILRA2/PVRIG/NCKAP1L/LCP2/THEMIS2/CLEC7A/LCK/PAK3
GO:0043299	leukocyte degranulation	4.97114e-13	5.4486e-11	21	ADGRE2/ITGAM/HCK/ANXA3/ITGB2/FGR/CHGA/BTK/RAC2/FCGR2B/LYN/CORO1A/CD300A/RASGRP1/PRAM1/SYK/MILR1/CD84/PIK3CG/NCKAP1L/VAMP8
GO:0097529	myeloid leukocyte migration	5.18053e-13	5.54905e-11	36	CCL4/PPBP/CXCL6/CX3CR1/CSF1R/PLA2G7/CCL8/C3AR1/ADGRE2/PF4/FCER1G/CCR1/C5AR1/ITGB2/CHGA/SLAMF8/RAC2/LYN/VAV1/EMILIN1/CD300A/JAML/BST1/NOD2/CCL19/SYK/CCL21/CCL11/PIK3CG/RHOG/CCL24/NCKAP1L/TREM1/MYD88/CD200/CKLF
GO:0002460	adaptive immune response based on somatic recombination of immune receptors built from immunoglobulin superfamily domains	5.38294e-13	5.63773e-11	47	IGKC/IGHM/C1QB/C3/IL1B/C7/C1QA/FCER1G/C1QC/CLU/IL7R/IGHV3-23/BTK/TNFSF13B/SASH3/CD1C/FCGR2B/CLC/IGHV3-21/CD1D/GAPT/TNFRSF1B/CD8A/IGHV4-28/TCIRG1/TNF/LILRB1/IL4I1/TLR8/C1R/PTPRC/NOD2/PTPN6/CCL19/IL12RB1/CD1B/MSH2/ZBTB1/LILRB4/MYO1G/EBI3/HAVCR2/HLA-DOB/NCKAP1L/TRPM4/CLEC7A/MYD88
GO:0002444	myeloid leukocyte mediated immunity	6.77943e-13	6.94597e-11	24	CXCL6/CX3CR1/C3/TYROBP/ADGRE2/ITGAM/ANXA3/ITGB2/FGR/CHGA/BTK/RAC2/FCGR2B/LYN/CD300A/RASGRP1/PRAM1/SYK/MILR1/CD84/PIK3CG/TREM1/VAMP8/MYD88
GO:0071216	cellular response to biotic stimulus	7.43339e-13	7.45395e-11	38	PPBP/PLCG2/CXCL6/CX3CR1/IL1B/LILRB2/CD36/MRC1/PF4/TLR1/CD14/HCK/IRF8/TLR2/CD86/PYCARD/LY96/BTK/FCGR2B/LYN/CCR5/TNFRSF1B/WNT5A/TNF/LY86/LILRB1/CD180/TXNIP/NOD2/BID/AXL/CASP1/SYK/HAVCR2/LILRA2/IRAK1/CLEC7A/MYD88
GO:0002699	positive regulation of immune effector process	8.25957e-13	8.10987e-11	37	PLCG2/C3/IL1B/TYROBP/CRTAM/CD36/ADGRE2/ITGAM/LAPTM5/ITGB2/FGR/CD86/BTK/SASH3/CD1C/RAC2/LYN/VAV1/CD1D/WNT5A/TNF/CD300A/LILRB1/RASGRP1/PTPRC/NOD2/CCL19/IL12RB1/SYK/CD1B/APPL2/MSH2/ZBTB1/CD84/VAMP8/CLEC7A/GPI
GO:0097530	granulocyte migration	9.37023e-13	9.01263e-11	29	CCL4/PPBP/CXCL6/CSF1R/CCL8/C3AR1/ADGRE2/PF4/FCER1G/C5AR1/ITGB2/SLAMF8/RAC2/VAV1/CD300A/JAML/BST1/NOD2/CCL19/SYK/CCL21/CCL11/PIK3CG/RHOG/CCL24/NCKAP1L/TREM1/MYD88/CKLF
GO:0051251	positive regulation of lymphocyte activation	9.94478e-13	9.37395e-11	47	IGKC/IGHM/IGF1/IL1B/TYROBP/LILRB2/IL7R/IGHV3-23/CD86/PYCARD/BTK/TNFSF13B/SASH3/CD24/GPR183/LYN/IGHV3-21/VAV1/CD1D/IGHV4-28/VTCN1/CORO1A/LILRB1/RASGRP1/IGFBP2/IL4I1/BST1/PTPRC/NOD2/RUNX3/PTPN6/CCL19/AXL/IL12RB1/SYK/CCL21/MSH2/ZBTB1/LILRB4/EBI3/HAVCR2/SIRPB1/HLA-DOB/NCKAP1L/CLEC7A/MYD88/LCK
GO:1990266	neutrophil migration	1.86209e-12	1.72079e-10	26	CCL4/PPBP/CXCL6/CCL8/C3AR1/PF4/FCER1G/C5AR1/ITGB2/SLAMF8/RAC2/VAV1/JAML/BST1/NOD2/CCL19/SYK/CCL21/CCL11/PIK3CG/RHOG/CCL24/NCKAP1L/TREM1/MYD88/CKLF
GO:0050764	regulation of phagocytosis	2.11171e-12	1.90513e-10	23	PLCG2/C3/IL1B/CD36/FCER1G/HCK/TLR2/FGR/DOCK2/PYCARD/FCGR2B/CD300LF/IL2RG/TNF/CD300A/PTPRC/NOD2/SYK/APPL2/SIRPB1/MFGE8/NCKAP1L/CLEC7A
GO:0006959	humoral immune response	2.14241e-12	1.90513e-10	43	IGKC/JCHAIN/PPBP/IGHM/CXCL6/C1QB/LYZ/FCN3/C3/VSIG4/IL1B/C7/C1QA/FCN1/PF4/CD5L/C1QC/WFDC2/BLNK/RNASE6/CFH/CLU/CFB/IGHV3-23/CFD/FCGR2B/GPR183/IGHV3-21/MFAP4/IGHV4-28/TNF/CFP/BST1/C1R/PTPRC/NOD2/PTPN6/PSMB10/EBI3/ALOX5/TREM1/ROMO1/GPI
GO:0032103	positive regulation of response to external stimulus	2.68561e-12	2.34394e-10	51	CCL4/PLCG2/CX3CR1/C3/IL1B/TYROBP/CRTAM/CSF1R/PLA2G7/FCN1/C3AR1/HCK/SMOC2/CCR1/C5AR1/TLR2/IL33/MNDA/CXCR4/PYCARD/LY96/BTK/PTGS2/RAC2/LYN/VAV1/CD1D/WNT5A/TNF/NLRC5/LY86/MMP12/GBP5/RASGRP1/TLR8/CD180/NOD2/TSLP/CCL19/SYK/CCL21/HAVCR2/PIK3CG/LILRA2/CCL24/PRKD1/FEM1A/NCKAP1L/VAMP8/CLEC7A/PAK3
GO:0001906	cell killing	3.45945e-12	2.96444e-10	32	CXCL6/CX3CR1/LYZ/C3/TYROBP/CRTAM/PF4/ITGAM/CD5L/SLAMF7/CFH/IL7R/CHGA/CD1C/FCGR2B/VAV1/CD1D/CORO1A/LILRB1/RASGRP1/PTPRC/PTPN6/IL12RB1/SYK/CD1B/ARRB2/HAVCR2/NCKAP1L/TREM1/ROMO1/CLEC7A/MYD88
GO:0050870	positive regulation of T cell activation	7.09972e-12	5.97517e-10	34	IGF1/IL1B/LILRB2/IL7R/CD86/PYCARD/TNFSF13B/SASH3/CD24/LYN/VAV1/CD1D/VTCN1/CORO1A/LILRB1/RASGRP1/IGFBP2/IL4I1/PTPRC/NOD2/RUNX3/PTPN6/CCL19/IL12RB1/SYK/CCL21/ZBTB1/LILRB4/EBI3/HAVCR2/SIRPB1/HLA-DOB/NCKAP1L/LCK
GO:1903131	mononuclear cell differentiation	8.4773e-12	7.00939e-10	50	PLCG2/IL1B/CRTAM/CSF1R/LILRB2/FCER1G/IRF8/BLNK/IL7R/GPR18/SLAMF8/DOCK2/CD86/DHRS2/BTK/TNFSF13B/SASH3/DOCK11/FCGR2B/GPR183/LYN/VAV1/CD1D/CD8A/EOMES/TCIRG1/CD3D/LILRB1/RASGRP1/CD2/IL4I1/CD79B/CMTM7/PTPRC/FLT3/RUNX3/PTPN6/CCL19/CDH17/AXL/IL12RB1/SYK/MSH2/ITGA4/ZBTB1/LILRB4/CD3G/NCKAP1L/KAT2A/LCK
GO:0030098	lymphocyte differentiation	1.18107e-11	9.59724e-10	46	PLCG2/IL1B/CRTAM/LILRB2/FCER1G/IRF8/BLNK/IL7R/GPR18/SLAMF8/DOCK2/CD86/BTK/TNFSF13B/SASH3/DOCK11/FCGR2B/GPR183/VAV1/CD1D/CD8A/EOMES/TCIRG1/CD3D/RASGRP1/CD2/IL4I1/CD79B/CMTM7/PTPRC/FLT3/RUNX3/PTPN6/CCL19/CDH17/AXL/IL12RB1/SYK/MSH2/ITGA4/ZBTB1/LILRB4/CD3G/NCKAP1L/KAT2A/LCK
GO:0030593	neutrophil chemotaxis	1.28014e-11	1.02259e-09	23	CCL4/PPBP/CXCL6/CCL8/C3AR1/PF4/FCER1G/C5AR1/ITGB2/RAC2/VAV1/JAML/BST1/NOD2/CCL19/SYK/CCL21/CCL11/PIK3CG/CCL24/NCKAP1L/TREM1/CKLF
GO:0050866	negative regulation of cell activation	1.51883e-11	1.18493e-09	33	VSIG4/TYROBP/CRTAM/LILRB2/LAPTM5/MNDA/LST1/FGR/CD86/BTK/FCGR2B/LYN/SAMSN1/EMILIN1/CD300LF/VTCN1/CD300A/LILRB1/IL4I1/PTPRC/RUNX3/PTPN6/AXL/MILR1/PAG1/LILRB4/CD84/HAVCR2/TNFAIP8L2/TBC1D10C/NCKAP1L/ALOX12/CD200
GO:0002695	negative regulation of leukocyte activation	1.53364e-11	1.18493e-09	31	VSIG4/TYROBP/CRTAM/LILRB2/LAPTM5/MNDA/LST1/FGR/CD86/BTK/FCGR2B/LYN/SAMSN1/CD300LF/VTCN1/CD300A/LILRB1/IL4I1/PTPRC/RUNX3/PTPN6/AXL/MILR1/PAG1/LILRB4/CD84/HAVCR2/TNFAIP8L2/TBC1D10C/NCKAP1L/CD200
GO:0042098	T cell proliferation	1.65706e-11	1.25963e-09	32	IGF1/VSIG4/IL1B/CRTAM/LILRB2/DOCK2/CD86/PYCARD/TNFSF13B/SASH3/RAC2/CD24/CLC/CD1D/TNFRSF1B/VTCN1/CORO1A/LILRB1/RASGRP1/IGFBP2/IL4I1/PTPRC/PTPN6/CCL19/IL12RB1/SYK/PSMB10/LILRB4/EBI3/HAVCR2/PIK3CG/NCKAP1L
GO:0071621	granulocyte chemotaxis	2.18321e-11	1.63325e-09	25	CCL4/PPBP/CXCL6/CSF1R/CCL8/C3AR1/ADGRE2/PF4/FCER1G/C5AR1/ITGB2/RAC2/VAV1/JAML/BST1/NOD2/CCL19/SYK/CCL21/CCL11/PIK3CG/CCL24/NCKAP1L/TREM1/CKLF
GO:0002886	regulation of myeloid leukocyte mediated immunity	3.19958e-11	2.35619e-09	17	CXCL6/CX3CR1/C3/TYROBP/ADGRE2/ITGAM/ITGB2/FGR/BTK/RAC2/FCGR2B/LYN/CD300A/PRAM1/SYK/CD84/VAMP8
GO:0031341	regulation of cell killing	3.95586e-11	2.8683e-09	22	CXCL6/CX3CR1/TYROBP/CRTAM/ITGAM/CD5L/CFH/IL7R/CD1C/FCGR2B/VAV1/CD1D/LILRB1/RASGRP1/PTPRC/IL12RB1/SYK/CD1B/ARRB2/HAVCR2/NCKAP1L/CLEC7A
GO:0002819	regulation of adaptive immune response	4.3598e-11	3.11329e-09	30	C3/IL1B/CD48/IL7R/PYCARD/BTK/TNFSF13B/SASH3/CD1C/FCGR2B/CLC/CD1D/SAMSN1/TNFRSF1B/TNF/LILRB1/IL4I1/PTPRC/NOD2/PTPN6/CCL19/IL12RB1/CD1B/MSH2/ZBTB1/LILRB4/HAVCR2/NCKAP1L/TRPM4/CLEC7A
GO:0042113	B cell activation	4.64577e-11	3.26799e-09	42	IGKC/IGHM/PLCG2/TYROBP/LAPTM5/IRF8/BLNK/MNDA/IL7R/IGHV3-23/SLAMF8/CD86/BTK/TNFSF13B/SASH3/DOCK11/FCGR2B/GPR183/LYN/IGHV3-21/GAPT/SAMSN1/IGHV4-28/TCIRG1/CD300A/RASGRP1/IL4I1/BST1/CD79B/CD180/CMTM7/PTPRC/NOD2/FLT3/PTPN6/CDH17/SYK/MSH2/ITGA4/TBC1D10C/NCKAP1L/THEMIS2
GO:0071219	cellular response to molecule of bacterial origin	6.2034e-11	4.2438e-09	33	PPBP/PLCG2/CXCL6/CX3CR1/IL1B/LILRB2/CD36/MRC1/PF4/TLR1/CD14/HCK/IRF8/TLR2/CD86/PYCARD/LY96/FCGR2B/LYN/CCR5/TNFRSF1B/WNT5A/TNF/LY86/LILRB1/CD180/NOD2/AXL/CASP1/HAVCR2/LILRA2/IRAK1/MYD88
GO:0050766	positive regulation of phagocytosis	6.21307e-11	4.2438e-09	18	PLCG2/C3/IL1B/CD36/FCER1G/DOCK2/PYCARD/FCGR2B/CD300LF/IL2RG/TNF/PTPRC/NOD2/APPL2/SIRPB1/MFGE8/NCKAP1L/CLEC7A
GO:0002706	regulation of lymphocyte mediated immunity	1.30351e-10	8.77637e-09	28	C3/IL1B/CRTAM/IL7R/BTK/SASH3/CD1C/FCGR2B/CLC/VAV1/CD1D/TNFRSF1B/TNF/LILRB1/RASGRP1/IL4I1/PTPRC/NOD2/PTPN6/IL12RB1/CD1B/MSH2/ZBTB1/LILRB4/ARRB2/HAVCR2/NCKAP1L/TRPM4
GO:0034113	heterotypic cell-cell adhesion	1.45317e-10	9.64618e-09	17	IL1B/LILRB2/ITGB2/CD44/DSP/GLDN/CD1D/TNF/ITGAX/CD2/IL1RN/PTPRC/ITGA4/BMP7/ITGA7/CD200/LCK
GO:0045088	regulation of innate immune response	1.90084e-10	1.24426e-08	32	PLCG2/VSIG4/TYROBP/CRTAM/FCN1/HCK/MNDA/FGR/SLAMF8/PYCARD/FCGR2B/LYN/VAV1/CD1D/WNT5A/SAMHD1/NLRC5/MMP12/LILRB1/GBP5/RASGRP1/TLR8/NOD2/PTPN6/SYK/APPL2/ARRB2/HAVCR2/LILRA2/CLEC7A/TTLL12/PAK3
GO:0042129	regulation of T cell proliferation	1.99646e-10	1.28895e-08	28	IGF1/VSIG4/IL1B/CRTAM/LILRB2/CD86/PYCARD/TNFSF13B/SASH3/RAC2/CD24/CLC/CD1D/TNFRSF1B/VTCN1/CORO1A/LILRB1/IGFBP2/IL4I1/PTPRC/PTPN6/CCL19/IL12RB1/SYK/LILRB4/EBI3/HAVCR2/NCKAP1L
GO:0071674	mononuclear cell migration	2.49005e-10	1.58589e-08	30	CCL4/CX3CR1/CRTAM/CSF1R/PLA2G7/CCL8/C3AR1/CCR1/C5AR1/ITGAL/SLAMF8/CXCR4/PYCARD/GPR183/LYN/CCR5/WNT5A/TNF/JAML/CCL19/CCL21/CCL11/ITGA4/MYO1G/PIK3CG/ALOX5/CCL24/TRPM4/CD200/CKLF
GO:0071222	cellular response to lipopolysaccharide	2.80524e-10	1.76281e-08	31	PPBP/PLCG2/CXCL6/CX3CR1/IL1B/LILRB2/CD36/MRC1/PF4/CD14/HCK/IRF8/TLR2/CD86/PYCARD/LY96/LYN/CCR5/TNFRSF1B/WNT5A/TNF/LY86/LILRB1/CD180/NOD2/AXL/CASP1/HAVCR2/LILRA2/IRAK1/MYD88
GO:0002831	regulation of response to biotic stimulus	3.13663e-10	1.94512e-08	40	PLCG2/CXCL6/VSIG4/TYROBP/CRTAM/CD36/FCN1/HCK/MNDA/FGR/SLAMF8/MICB/PYCARD/LY96/FCGR2B/LYN/VAV1/CD1D/WNT5A/SAMHD1/NLRC5/LY86/MMP12/LILRB1/GBP5/RASGRP1/IL4I1/TLR8/CD180/NOD2/PTPN6/IL12RB1/SYK/APPL2/ARRB2/HAVCR2/LILRA2/CLEC7A/TTLL12/PAK3
GO:0002822	regulation of adaptive immune response based on somatic recombination of immune receptors built from immunoglobulin superfamily domains	6.47055e-10	3.96048e-08	27	C3/IL1B/IL7R/BTK/TNFSF13B/SASH3/CD1C/FCGR2B/CLC/CD1D/TNFRSF1B/TNF/LILRB1/IL4I1/PTPRC/NOD2/PTPN6/CCL19/IL12RB1/CD1B/MSH2/ZBTB1/LILRB4/HAVCR2/NCKAP1L/TRPM4/CLEC7A
GO:0001909	leukocyte mediated cytotoxicity	6.68751e-10	4.0408e-08	23	CXCL6/CX3CR1/TYROBP/CRTAM/ITGAM/SLAMF7/IL7R/CD1C/FCGR2B/VAV1/CD1D/CORO1A/LILRB1/RASGRP1/PTPRC/PTPN6/IL12RB1/CD1B/ARRB2/HAVCR2/NCKAP1L/TREM1/MYD88
GO:0051250	negative regulation of lymphocyte activation	6.88418e-10	4.10698e-08	26	VSIG4/TYROBP/CRTAM/LILRB2/LAPTM5/MNDA/LST1/FGR/CD86/BTK/FCGR2B/LYN/SAMSN1/VTCN1/CD300A/LILRB1/IL4I1/RUNX3/PTPN6/AXL/PAG1/LILRB4/HAVCR2/TNFAIP8L2/TBC1D10C/NCKAP1L
GO:0045576	mast cell activation	1.76205e-09	1.03806e-07	16	ADGRE2/FGR/CHGA/BTK/RAC2/LYN/CD300LF/CD300A/RASGRP1/TSLP/SYK/MILR1/CD84/PIK3CG/LCP2/VAMP8
GO:0031349	positive regulation of defense response	1.89145e-09	1.10054e-07	35	PLCG2/C3/IL1B/TYROBP/CRTAM/PLA2G7/FCN1/HCK/TLR2/IL33/MNDA/PYCARD/BTK/PTGS2/LYN/VAV1/CD1D/WNT5A/TNF/NLRC5/MMP12/GBP5/RASGRP1/TLR8/NOD2/TSLP/SYK/HAVCR2/PIK3CG/LILRA2/CCL24/FEM1A/VAMP8/CLEC7A/PAK3
GO:1902105	regulation of leukocyte differentiation	2.0823e-09	1.1964e-07	35	TYROBP/CRTAM/LILRB2/PF4/CCR1/EVI2B/C1QC/HCLS1/IL7R/SLAMF8/CD86/BTK/SASH3/FCGR2B/RASSF2/LYN/TNF/LILRB1/RASGRP1/CD2/IL4I1/PTPRC/RUNX3/PTPN6/CCL19/AXL/IL12RB1/SYK/ZBTB1/FSTL3/LILRB4/TESC/NCKAP1L/LILRB3/KAT2A
GO:0002237	response to molecule of bacterial origin	2.10696e-09	1.1964e-07	41	PPBP/PLCG2/CXCL6/CX3CR1/IL1B/CSF2RB/LILRB2/CD36/IL10RA/MRC1/PF4/TLR1/CD14/HCK/C5AR1/IRF8/TLR2/SELP/CD86/PYCARD/LY96/PTGS2/KCNJ8/FCGR2B/CD24/LYN/CCR5/TNFRSF1B/WNT5A/GGT5/TNF/LY86/LILRB1/CD180/NOD2/AXL/CASP1/HAVCR2/LILRA2/IRAK1/MYD88
GO:0070664	negative regulation of leukocyte proliferation	2.13432e-09	1.19751e-07	19	VSIG4/TYROBP/CRTAM/LILRB2/CCL8/IL33/MNDA/LST1/CD86/BTK/FCGR2B/LYN/VTCN1/CD300A/LILRB1/IL4I1/PTPN6/LILRB4/HAVCR2
GO:0001910	regulation of leukocyte mediated cytotoxicity	2.91176e-09	1.61449e-07	18	CXCL6/CX3CR1/TYROBP/CRTAM/ITGAM/IL7R/CD1C/FCGR2B/VAV1/CD1D/LILRB1/RASGRP1/PTPRC/IL12RB1/CD1B/ARRB2/HAVCR2/NCKAP1L
GO:0030198	extracellular matrix organization	4.48161e-09	2.45603e-07	36	LUM/COL1A2/COL1A1/MMP7/SFRP2/FBLN5/CTSV/LCP1/MMP1/TGFBI/AEBP1/SMOC2/COMP/CTSS/MMP2/FMOD/ADAMTS3/FAP/MMP9/COL14A1/MFAP4/EMILIN1/TNFRSF1B/COL16A1/TNF/MMP12/COL5A1/LAMB3/TMEM38B/ADAMTSL3/MMP10/COL11A1/ADAMTS16/ADAMTS2/OLFML2A/COL10A1
GO:0043062	extracellular structure organization	4.89883e-09	2.65381e-07	36	LUM/COL1A2/COL1A1/MMP7/SFRP2/FBLN5/CTSV/LCP1/MMP1/TGFBI/AEBP1/SMOC2/COMP/CTSS/MMP2/FMOD/ADAMTS3/FAP/MMP9/COL14A1/MFAP4/EMILIN1/TNFRSF1B/COL16A1/TNF/MMP12/COL5A1/LAMB3/TMEM38B/ADAMTSL3/MMP10/COL11A1/ADAMTS16/ADAMTS2/OLFML2A/COL10A1
GO:0002709	regulation of T cell mediated immunity	5.36464e-09	2.87313e-07	18	IL1B/IL7R/SASH3/CD1C/FCGR2B/CLC/CD1D/TNFRSF1B/LILRB1/IL4I1/PTPRC/NOD2/IL12RB1/CD1B/ZBTB1/LILRB4/NCKAP1L/TRPM4
GO:0002685	regulation of leukocyte migration	5.67821e-09	3.0069e-07	29	CCL4/CX3CR1/CSF1R/PLA2G7/CCL8/C3AR1/CCR1/C5AR1/SELP/GPR18/SLAMF8/PYCARD/RAC2/LYN/EMILIN1/WNT5A/TNF/CD300A/BST1/NOD2/CCL19/CCL21/ITGA4/RHOG/CCL24/PLVAP/NCKAP1L/MYD88/CD200
GO:0045229	external encapsulating structure organization	5.84558e-09	3.06114e-07	36	LUM/COL1A2/COL1A1/MMP7/SFRP2/FBLN5/CTSV/LCP1/MMP1/TGFBI/AEBP1/SMOC2/COMP/CTSS/MMP2/FMOD/ADAMTS3/FAP/MMP9/COL14A1/MFAP4/EMILIN1/TNFRSF1B/COL16A1/TNF/MMP12/COL5A1/LAMB3/TMEM38B/ADAMTSL3/MMP10/COL11A1/ADAMTS16/ADAMTS2/OLFML2A/COL10A1
GO:0070665	positive regulation of leukocyte proliferation	6.31466e-09	3.26831e-07	24	IGF1/IL1B/CSF1R/LILRB2/CD86/PYCARD/TNFSF13B/SASH3/CD24/GPR183/LYN/CD1D/VTCN1/CORO1A/IGFBP2/BST1/PTPRC/CCL19/IL12RB1/SYK/EBI3/HAVCR2/NCKAP1L/MYD88
GO:0042116	macrophage activation	6.3799e-09	3.26831e-07	20	PLCG2/CX3CR1/VSIG4/TYROBP/C1QA/TLR1/ITGAM/C5AR1/TLR2/IL33/ITGB2/CLU/FCGR2B/WNT5A/TNF/PTPRC/SYK/CD84/HAVCR2/CD200
GO:0042119	neutrophil activation	7.84164e-09	3.97394e-07	12	CXCL6/TYROBP/FCER1G/ITGAM/ANXA3/ITGB2/FCGR2B/CD300A/PRAM1/SYK/LILRA2/MYD88
GO:0002283	neutrophil activation involved in immune response	8.69664e-09	4.36035e-07	9	TYROBP/FCER1G/ITGAM/ANXA3/ITGB2/PRAM1/SYK/LILRA2/MYD88
GO:0006956	complement activation	9.33031e-09	4.62881e-07	22	IGKC/IGHM/C1QB/FCN3/C3/VSIG4/IL1B/C7/C1QA/FCN1/CD5L/C1QC/CFH/CLU/CFB/IGHV3-23/CFD/IGHV3-21/MFAP4/IGHV4-28/CFP/C1R
GO:0032635	interleukin-6 production	9.60914e-09	4.66885e-07	25	PLCG2/IL1B/TYROBP/LILRB2/CD36/TLR1/TLR2/IL33/PYCARD/WNT5A/TNF/TLR8/NOD2/PTPN6/TSLP/SYK/LILRB4/ARRB2/CD84/HAVCR2/LILRA2/NCKAP1L/CLEC7A/MYD88/CD200
GO:0032675	regulation of interleukin-6 production	9.60914e-09	4.66885e-07	25	PLCG2/IL1B/TYROBP/LILRB2/CD36/TLR1/TLR2/IL33/PYCARD/WNT5A/TNF/TLR8/NOD2/PTPN6/TSLP/SYK/LILRB4/ARRB2/CD84/HAVCR2/LILRA2/NCKAP1L/CLEC7A/MYD88/CD200
GO:0002456	T cell mediated immunity	1.05356e-08	5.06677e-07	20	IL1B/IL7R/SASH3/CD1C/FCGR2B/CLC/CD1D/TNFRSF1B/CD8A/LILRB1/IL4I1/PTPRC/NOD2/IL12RB1/CD1B/ZBTB1/LILRB4/MYO1G/NCKAP1L/TRPM4
GO:0045089	positive regulation of innate immune response	1.07987e-08	5.14084e-07	22	PLCG2/TYROBP/CRTAM/FCN1/HCK/MNDA/PYCARD/LYN/VAV1/CD1D/WNT5A/NLRC5/MMP12/GBP5/RASGRP1/TLR8/NOD2/SYK/HAVCR2/LILRA2/CLEC7A/PAK3
GO:0032611	interleukin-1 beta production	1.24017e-08	5.78704e-07	20	CX3CR1/IGF1/TYROBP/CD36/MNDA/PYCARD/WNT5A/TNF/GBP5/TLR8/NOD2/CCL19/CASP1/NLRP2/LILRB4/ARRB2/LILRA2/CLEC7A/MYD88/CD33
GO:0032651	regulation of interleukin-1 beta production	1.24017e-08	5.78704e-07	20	CX3CR1/IGF1/TYROBP/CD36/MNDA/PYCARD/WNT5A/TNF/GBP5/TLR8/NOD2/CCL19/CASP1/NLRP2/LILRB4/ARRB2/LILRA2/CLEC7A/MYD88/CD33
GO:0002833	positive regulation of response to biotic stimulus	1.39556e-08	6.38661e-07	25	PLCG2/TYROBP/CRTAM/FCN1/HCK/MNDA/PYCARD/LY96/LYN/VAV1/CD1D/WNT5A/NLRC5/LY86/MMP12/GBP5/RASGRP1/TLR8/CD180/NOD2/SYK/HAVCR2/LILRA2/CLEC7A/PAK3
GO:0032496	response to lipopolysaccharide	1.39576e-08	6.38661e-07	38	PPBP/PLCG2/CXCL6/CX3CR1/IL1B/CSF2RB/LILRB2/CD36/IL10RA/MRC1/PF4/CD14/HCK/C5AR1/IRF8/TLR2/SELP/CD86/PYCARD/LY96/PTGS2/KCNJ8/LYN/CCR5/TNFRSF1B/WNT5A/GGT5/TNF/LY86/LILRB1/CD180/NOD2/AXL/CASP1/HAVCR2/LILRA2/IRAK1/MYD88
GO:0032731	positive regulation of interleukin-1 beta production	1.48276e-08	6.65546e-07	15	TYROBP/CD36/MNDA/PYCARD/WNT5A/TNF/GBP5/TLR8/NOD2/CCL19/CASP1/NLRP2/LILRA2/CLEC7A/MYD88
GO:0032757	positive regulation of interleukin-8 production	1.48276e-08	6.65546e-07	15	IL1B/FCN1/TLR1/CD14/TLR2/PYCARD/WNT5A/TNF/CD2/TLR8/NOD2/SYK/LILRA2/CLEC7A/MYD88
GO:0042102	positive regulation of T cell proliferation	1.60276e-08	7.12626e-07	19	IGF1/IL1B/LILRB2/CD86/PYCARD/TNFSF13B/SASH3/CD24/CD1D/VTCN1/CORO1A/IGFBP2/PTPRC/CCL19/IL12RB1/SYK/EBI3/HAVCR2/NCKAP1L
GO:0032609	interferon-gamma production	1.70819e-08	7.43663e-07	20	IL1B/CRTAM/CD14/LAPTM5/IRF8/PYCARD/SASH3/WNT5A/TNF/LILRB1/RASGRP1/CD2/TLR8/NOD2/AXL/IL12RB1/LILRB4/EBI3/HAVCR2/CLEC7A
GO:0032649	regulation of interferon-gamma production	1.70819e-08	7.43663e-07	20	IL1B/CRTAM/CD14/LAPTM5/IRF8/PYCARD/SASH3/WNT5A/TNF/LILRB1/RASGRP1/CD2/TLR8/NOD2/AXL/IL12RB1/LILRB4/EBI3/HAVCR2/CLEC7A
GO:0006968	cellular defense response	1.71991e-08	7.43663e-07	14	CX3CR1/TYROBP/LILRB2/NCF2/CLEC5A/CD5L/C5AR1/IL33/MNDA/LY96/CCR5/TCIRG1/LSP1/ADORA2B
GO:0043300	regulation of leukocyte degranulation	1.78961e-08	7.66767e-07	13	ADGRE2/ITGAM/ITGB2/FGR/RAC2/FCGR2B/LYN/CD300A/PRAM1/SYK/CD84/NCKAP1L/VAMP8
GO:0032729	positive regulation of interferon-gamma production	1.82667e-08	7.75593e-07	16	IL1B/CRTAM/CD14/IRF8/PYCARD/SASH3/WNT5A/TNF/LILRB1/RASGRP1/CD2/TLR8/IL12RB1/EBI3/HAVCR2/CLEC7A
GO:0032732	positive regulation of interleukin-1 production	2.25373e-08	9.48378e-07	16	TYROBP/CD36/MNDA/PYCARD/WNT5A/TNF/GBP5/TLR8/NOD2/CCL19/CASP1/NLRP2/HAVCR2/LILRA2/CLEC7A/MYD88
GO:0032755	positive regulation of interleukin-6 production	2.39936e-08	1.00072e-06	18	PLCG2/IL1B/TYROBP/LILRB2/CD36/TLR1/TLR2/IL33/PYCARD/WNT5A/TNF/TLR8/NOD2/TSLP/SYK/LILRA2/CLEC7A/MYD88
GO:0050672	negative regulation of lymphocyte proliferation	2.42075e-08	1.00079e-06	17	VSIG4/TYROBP/CRTAM/LILRB2/MNDA/LST1/CD86/BTK/FCGR2B/LYN/VTCN1/CD300A/LILRB1/IL4I1/PTPN6/LILRB4/HAVCR2
GO:0050864	regulation of B cell activation	2.49513e-08	1.02218e-06	27	IGKC/IGHM/TYROBP/LAPTM5/MNDA/IGHV3-23/SLAMF8/BTK/TNFSF13B/SASH3/FCGR2B/GPR183/LYN/IGHV3-21/SAMSN1/IGHV4-28/CD300A/IL4I1/BST1/PTPRC/NOD2/PTPN6/SYK/MSH2/TBC1D10C/NCKAP1L/THEMIS2
GO:0050671	positive regulation of lymphocyte proliferation	2.51586e-08	1.02218e-06	22	IGF1/IL1B/LILRB2/CD86/PYCARD/TNFSF13B/SASH3/CD24/GPR183/CD1D/VTCN1/CORO1A/IGFBP2/BST1/PTPRC/CCL19/IL12RB1/SYK/EBI3/HAVCR2/NCKAP1L/MYD88
GO:0032946	positive regulation of mononuclear cell proliferation	2.88234e-08	1.16106e-06	22	IGF1/IL1B/LILRB2/CD86/PYCARD/TNFSF13B/SASH3/CD24/GPR183/CD1D/VTCN1/CORO1A/IGFBP2/BST1/PTPRC/CCL19/IL12RB1/SYK/EBI3/HAVCR2/NCKAP1L/MYD88
GO:0032945	negative regulation of mononuclear cell proliferation	2.92358e-08	1.1677e-06	17	VSIG4/TYROBP/CRTAM/LILRB2/MNDA/LST1/CD86/BTK/FCGR2B/LYN/VTCN1/CD300A/LILRB1/IL4I1/PTPN6/LILRB4/HAVCR2
GO:0043303	mast cell degranulation	3.151e-08	1.24796e-06	13	ADGRE2/FGR/CHGA/BTK/RAC2/LYN/CD300A/RASGRP1/SYK/MILR1/CD84/PIK3CG/VAMP8
GO:0032612	interleukin-1 production	3.54822e-08	1.38205e-06	21	CX3CR1/IGF1/TYROBP/CD36/MNDA/PYCARD/WNT5A/TNF/GBP5/TLR8/NOD2/CCL19/CASP1/NLRP2/LILRB4/ARRB2/HAVCR2/LILRA2/CLEC7A/MYD88/CD33
GO:0032652	regulation of interleukin-1 production	3.54822e-08	1.38205e-06	21	CX3CR1/IGF1/TYROBP/CD36/MNDA/PYCARD/WNT5A/TNF/GBP5/TLR8/NOD2/CCL19/CASP1/NLRP2/LILRB4/ARRB2/HAVCR2/LILRA2/CLEC7A/MYD88/CD33
GO:0002279	mast cell activation involved in immune response	4.13329e-08	1.59674e-06	13	ADGRE2/FGR/CHGA/BTK/RAC2/LYN/CD300A/RASGRP1/SYK/MILR1/CD84/PIK3CG/VAMP8
GO:0098883	synapse pruning	4.53332e-08	1.73704e-06	7	C1QB/CX3CR1/C3/C1QA/ITGAM/C1QC/EPHA4
GO:0002448	mast cell mediated immunity	5.38295e-08	2.04595e-06	13	ADGRE2/FGR/CHGA/BTK/RAC2/LYN/CD300A/RASGRP1/SYK/MILR1/CD84/PIK3CG/VAMP8
GO:0002224	toll-like receptor signaling pathway	6.58878e-08	2.48423e-06	20	PLCG2/CD36/TLR1/CD14/CTSS/TLR2/LY96/BTK/LYN/CD300LF/CD300A/TLR8/NOD2/PIK3AP1/APPL2/ARRB2/HAVCR2/LILRA2/IRAK1/MYD88
GO:0038094	Fc-gamma receptor signaling pathway	6.66147e-08	2.49171e-06	10	FCER1G/HCK/FGR/FCGR2B/LYN/VAV1/PTPRC/SYK/APPL2/MYO1G
GO:1902107	positive regulation of leukocyte differentiation	7.09243e-08	2.61145e-06	23	TYROBP/LILRB2/PF4/CCR1/EVI2B/HCLS1/IL7R/CD86/BTK/SASH3/TNF/RASGRP1/IL4I1/PTPRC/RUNX3/CCL19/AXL/IL12RB1/SYK/ZBTB1/LILRB4/TESC/NCKAP1L
GO:1903708	positive regulation of hemopoiesis	7.09243e-08	2.61145e-06	23	TYROBP/LILRB2/PF4/CCR1/EVI2B/HCLS1/IL7R/CD86/BTK/SASH3/TNF/RASGRP1/IL4I1/PTPRC/RUNX3/CCL19/AXL/IL12RB1/SYK/ZBTB1/LILRB4/TESC/NCKAP1L
GO:0031663	lipopolysaccharide-mediated signaling pathway	7.35869e-08	2.67222e-06	14	PLCG2/IL1B/CD36/CD14/HCK/TLR2/LY96/LYN/TNF/LY86/CD180/LILRA2/IRAK1/MYD88
GO:0042742	defense response to bacterium	7.37384e-08	2.67222e-06	37	IGKC/JCHAIN/PPBP/IGHM/CXCL6/LYZ/MPEG1/PLAC8/CD36/FCER1G/C5AR1/ANXA3/WFDC2/IRF8/TLR2/RNASE6/SELP/FGR/IL7R/CHGA/IGHV3-23/SLAMF8/PYCARD/IGHV3-21/IGHV4-28/TNF/CFP/STAB1/NOD2/CASP1/SYK/HAVCR2/TRAV27/PRKD1/TREM1/ROMO1/MYD88
GO:0036230	granulocyte activation	7.42757e-08	2.67222e-06	12	CXCL6/TYROBP/FCER1G/ITGAM/ANXA3/ITGB2/FCGR2B/CD300A/PRAM1/SYK/LILRA2/MYD88
GO:0002705	positive regulation of leukocyte mediated immunity	8.04359e-08	2.87193e-06	21	PLCG2/C3/IL1B/TYROBP/CRTAM/ITGAM/ITGB2/BTK/SASH3/CD1C/VAV1/CD1D/TNF/RASGRP1/PTPRC/NOD2/IL12RB1/CD1B/MSH2/ZBTB1/CLEC7A
GO:0050727	regulation of inflammatory response	1.09968e-07	3.89684e-06	39	PLCG2/C3/IGF1/IL1B/PLA2G7/SERPINF1/HCK/TLR2/IL33/FGR/SLAMF8/PYCARD/BTK/PTGS2/MMP9/FCGR2B/LYN/TNFRSF1B/WNT5A/TNF/BST1/AOAH/PTPRC/NOD2/PIK3AP1/TSLP/CASP1/SYK/METRNL/PIK3CG/TNFAIP8L2/ALOX5/NR1D2/CCL24/FEM1A/VAMP8/MYD88/CD200/SIGLEC10
GO:0002758	innate immune response-activating signal transduction	1.22059e-07	4.29303e-06	9	PLCG2/TYROBP/FCN1/HCK/LYN/SYK/LILRA2/CLEC7A/PAK3
GO:0045730	respiratory burst	1.27098e-07	4.43714e-06	11	JCHAIN/CD52/CYBB/NCF2/HCK/SLAMF8/RAC2/CD24/NCF4/PIK3CG/CLEC7A
GO:0002704	negative regulation of leukocyte mediated immunity	1.4192e-07	4.91816e-06	14	CX3CR1/IL7R/FCGR2B/CD300A/LILRB1/IL4I1/PTPRC/NOD2/PTPN6/LILRB4/ARRB2/CD84/HAVCR2/NCKAP1L
GO:0030217	T cell differentiation	1.49422e-07	5.13774e-06	30	IL1B/CRTAM/LILRB2/FCER1G/IL7R/GPR18/DOCK2/CD86/SASH3/GPR183/VAV1/CD1D/CD8A/EOMES/TCIRG1/CD3D/RASGRP1/CD2/IL4I1/PTPRC/RUNX3/CCL19/IL12RB1/SYK/ZBTB1/LILRB4/CD3G/NCKAP1L/KAT2A/LCK
GO:0006911	phagocytosis, engulfment	1.50437e-07	5.13774e-06	20	IGKC/IGHM/PLCG2/C3/CD36/ITGAM/ITGB2/IGHV3-23/RAC2/MARCO/FCGR2B/IGHV3-21/XKR4/IGHV4-28/CD300A/APPL2/BIN2/RHOG/MFGE8/NCKAP1L
GO:0030183	B cell differentiation	1.96384e-07	6.65869e-06	21	PLCG2/IRF8/BLNK/SLAMF8/BTK/TNFSF13B/DOCK11/FCGR2B/GPR183/TCIRG1/IL4I1/CD79B/CMTM7/PTPRC/FLT3/PTPN6/CDH17/SYK/MSH2/ITGA4/NCKAP1L
GO:1903706	regulation of hemopoiesis	2.46026e-07	8.28228e-06	37	TYROBP/CRTAM/LILRB2/PF4/CCR1/EVI2B/C1QC/HCLS1/IL7R/SLAMF8/CD86/BTK/SASH3/FCGR2B/RASSF2/LYN/TNF/GPR171/LILRB1/RASGRP1/CD2/IL4I1/PTPRC/RUNX3/PTPN6/CCL19/AXL/IL12RB1/SYK/ZBTB1/FSTL3/LILRB4/TESC/NCKAP1L/LILRB3/KAT2A/HOXA5
GO:0050777	negative regulation of immune response	2.48379e-07	8.30221e-06	25	VSIG4/HCK/FGR/IL7R/SLAMF8/MICB/FCGR2B/LYN/SAMSN1/SAMHD1/NLRC5/MMP12/CD300A/LILRB1/IL4I1/PTPRC/NOD2/PTPN6/SYK/LILRB4/ARRB2/CD84/HAVCR2/NCKAP1L/TTLL12
GO:0002367	cytokine production involved in immune response	3.10073e-07	1.02914e-05	17	PLCG2/IL1B/CD36/LAPTM5/BTK/SASH3/CLC/TNFRSF1B/WNT5A/TNF/LILRB1/NOD2/TGFB3/LILRB4/TRPM4/TREM1/CLEC7A
GO:0002698	negative regulation of immune effector process	3.477e-07	1.14595e-05	18	CX3CR1/VSIG4/IL7R/SLAMF8/FCGR2B/TNF/CD300A/LILRB1/IL4I1/PTPRC/NOD2/PTPN6/TGFB3/LILRB4/ARRB2/CD84/HAVCR2/NCKAP1L
GO:0032602	chemokine production	3.60639e-07	1.18034e-05	17	CXCL6/IL1B/CSF1R/TLR2/IL33/PYCARD/WNT5A/TNF/NOD2/TSLP/SYK/LILRB4/CD84/HAVCR2/TREM1/CLEC7A/MYD88
GO:0002431	Fc receptor mediated stimulatory signaling pathway	3.91853e-07	1.26493e-05	10	FCER1G/HCK/FGR/FCGR2B/LYN/VAV1/PTPRC/SYK/APPL2/MYO1G
GO:0036336	dendritic cell migration	3.91853e-07	1.26493e-05	10	CCR1/SLAMF8/CXCR4/GPR183/CCR5/CCL19/CCL21/PIK3CG/ALOX5/TRPM4
GO:1902622	regulation of neutrophil migration	4.05809e-07	1.30107e-05	11	C3AR1/C5AR1/SLAMF8/RAC2/BST1/NOD2/CCL19/CCL21/RHOG/NCKAP1L/MYD88
GO:0045807	positive regulation of endocytosis	4.18585e-07	1.32507e-05	17	PLCG2/C3/CD36/CD14/CLU/DNM1/SFRP4/WNT5A/CCL19/AXL/SYK/CCL21/APPL2/ARRB2/MAGI2/NCKAP1L/MIB1
GO:0002407	dendritic cell chemotaxis	4.18918e-07	1.32507e-05	9	CCR1/SLAMF8/CXCR4/GPR183/CCR5/CCL19/CCL21/PIK3CG/TRPM4
GO:0038093	Fc receptor signaling pathway	4.54558e-07	1.42822e-05	12	PLCG2/FCER1G/HCK/FGR/BTK/FCGR2B/LYN/VAV1/PTPRC/SYK/APPL2/MYO1G
GO:0099024	plasma membrane invagination	4.71116e-07	1.47044e-05	20	IGKC/IGHM/PLCG2/C3/CD36/ITGAM/ITGB2/IGHV3-23/RAC2/MARCO/FCGR2B/IGHV3-21/XKR4/IGHV4-28/CD300A/APPL2/BIN2/RHOG/MFGE8/NCKAP1L
GO:0046629	gamma-delta T cell activation	5.13994e-07	1.59372e-05	8	GPR18/MICB/JAML/LILRB1/PTPRC/NOD2/SYK/NCKAP1L
GO:0033003	regulation of mast cell activation	5.30093e-07	1.63289e-05	11	ADGRE2/FGR/RAC2/LYN/CD300LF/CD300A/TSLP/SYK/MILR1/CD84/VAMP8
GO:0032677	regulation of interleukin-8 production	5.6052e-07	1.71541e-05	17	IL1B/FCN1/TLR1/CD14/TLR2/PYCARD/WNT5A/TNF/CD2/TLR8/PTPRC/NOD2/SYK/LILRA2/CLEC7A/MYD88/CD33
GO:0007162	negative regulation of cell adhesion	5.73224e-07	1.74297e-05	32	COL1A1/VSIG4/CRTAM/LILRB2/TACSTD2/TGFBI/LAPTM5/FXYD5/CD86/LPXN/FCGR2B/VTCN1/MMP12/CD300A/LILRB1/IL4I1/AP1AR/IL1RN/PTPRC/RUNX3/PTPN6/MUC1/CCL21/PAG1/LILRB4/HAVCR2/TNFAIP8L2/CORO1C/EPB41L5/ADAMDEC1/NCKAP1L/ALOX12
GO:0002433	immune response-regulating cell surface receptor signaling pathway involved in phagocytosis	6.06173e-07	1.81968e-05	9	HCK/FGR/FCGR2B/LYN/VAV1/PTPRC/SYK/APPL2/MYO1G
GO:0038096	Fc-gamma receptor signaling pathway involved in phagocytosis	6.06173e-07	1.81968e-05	9	HCK/FGR/FCGR2B/LYN/VAV1/PTPRC/SYK/APPL2/MYO1G
GO:0032637	interleukin-8 production	6.46733e-07	1.92915e-05	17	IL1B/FCN1/TLR1/CD14/TLR2/PYCARD/WNT5A/TNF/CD2/TLR8/PTPRC/NOD2/SYK/LILRA2/CLEC7A/MYD88/CD33
GO:0030199	collagen fibril organization	6.63737e-07	1.96742e-05	13	LUM/COL1A2/COL1A1/SFRP2/AEBP1/COMP/FMOD/ADAMTS3/COL14A1/EMILIN1/COL5A1/COL11A1/ADAMTS2
GO:0032722	positive regulation of chemokine production	6.79506e-07	2.00157e-05	14	IL1B/CSF1R/TLR2/IL33/PYCARD/WNT5A/TNF/NOD2/TSLP/SYK/CD84/HAVCR2/CLEC7A/MYD88
GO:0043277	apoptotic cell clearance	7.18058e-07	2.10199e-05	12	FCN3/C3/TYROBP/CD36/FCN1/RAC2/MARCO/XKR4/CD300LF/AXL/RHOG/MFGE8
GO:0032963	collagen metabolic process	7.44794e-07	2.1668e-05	17	COL1A2/COL1A1/MMP7/MMP1/CTSS/MMP2/ADAMTS3/FAP/MMP9/MFAP4/EMILIN1/MMP12/COL5A1/TGFB3/MMP10/ARRB2/ADAMTS2
GO:0150146	cell junction disassembly	8.01262e-07	2.28436e-05	8	C1QB/CX3CR1/C3/C1QA/ITGAM/C1QC/TGFB3/EPHA4
GO:0032615	interleukin-12 production	8.0944e-07	2.28436e-05	13	PLCG2/CD36/LAPTM5/IRF8/TLR2/LTB/LILRB1/TLR8/NOD2/CCL19/SYK/ARRB2/CLEC7A
GO:0032623	interleukin-2 production	8.0944e-07	2.28436e-05	13	PLCG2/VSIG4/IL1B/LAPTM5/CD86/SASH3/VTCN1/PTPRC/NOD2/EZR/LILRB4/HAVCR2/CLEC7A
GO:0032655	regulation of interleukin-12 production	8.0944e-07	2.28436e-05	13	PLCG2/CD36/LAPTM5/IRF8/TLR2/LTB/LILRB1/TLR8/NOD2/CCL19/SYK/ARRB2/CLEC7A
GO:0032663	regulation of interleukin-2 production	8.0944e-07	2.28436e-05	13	PLCG2/VSIG4/IL1B/LAPTM5/CD86/SASH3/VTCN1/PTPRC/NOD2/EZR/LILRB4/HAVCR2/CLEC7A
GO:0016064	immunoglobulin mediated immune response	8.55636e-07	2.40036e-05	25	IGKC/IGHM/C1QB/C3/C7/C1QA/FCER1G/C1QC/CLU/IGHV3-23/BTK/FCGR2B/IGHV3-21/GAPT/IGHV4-28/TCIRG1/TNF/TLR8/C1R/PTPRC/NOD2/PTPN6/MSH2/HLA-DOB/MYD88
GO:0031295	T cell costimulation	8.82893e-07	2.45385e-05	11	LILRB2/CD86/TNFSF13B/CD24/LYN/VAV1/PTPN6/CCL19/CCL21/LILRB4/LCK
GO:0070372	regulation of ERK1 and ERK2 cascade	8.85114e-07	2.45385e-05	32	CCL4/IGF1/IL1B/CSF1R/FN1/CD36/CCL8/CCR1/C5AR1/CD44/PYCARD/MARCO/GPR183/LYN/EMILIN1/TNF/RASGRP1/PTPRC/NOD2/PTPN6/CCL19/GLIPR2/SYK/EZR/CCL21/CCL11/ARRB2/HAVCR2/CCL24/TBC1D10C/EPHA7/RPS6KA6
GO:0031343	positive regulation of cell killing	9.82995e-07	2.70927e-05	13	TYROBP/CRTAM/ITGAM/CD5L/CD1C/VAV1/CD1D/RASGRP1/PTPRC/IL12RB1/SYK/CD1B/CLEC7A
GO:0002532	production of molecular mediator involved in inflammatory response	1.0394e-06	2.84808e-05	16	CD36/SLAMF8/PYCARD/BTK/LYN/TNF/GBP5/NOD2/ABCD1/SYK/APPL2/LILRB4/ALOX5/VAMP8/CLEC7A/MYD88
GO:0019724	B cell mediated immunity	1.1198e-06	3.03298e-05	25	IGKC/IGHM/C1QB/C3/C7/C1QA/FCER1G/C1QC/CLU/IGHV3-23/BTK/FCGR2B/IGHV3-21/GAPT/IGHV4-28/TCIRG1/TNF/TLR8/C1R/PTPRC/NOD2/PTPN6/MSH2/HLA-DOB/MYD88
GO:0007229	integrin-mediated signaling pathway	1.12513e-06	3.03298e-05	17	FN1/ITGAM/HCK/PLEK/ITGB2/FGR/ITGAL/VAV1/COL16A1/ITGAX/BST1/PRAM1/CDH17/SYK/ITGA4/PRKD1/ITGA7
GO:0050853	B cell receptor signaling pathway	1.12619e-06	3.03298e-05	19	IGKC/IGHM/PLCG2/BLNK/MNDA/IGHV3-23/BTK/LPXN/FCGR2B/LYN/IGHV3-21/IGHV4-28/CD300A/CD79B/PTPRC/PTPN6/SYK/NCKAP1L/LCK
GO:0010324	membrane invagination	1.19257e-06	3.1935e-05	20	IGKC/IGHM/PLCG2/C3/CD36/ITGAM/ITGB2/IGHV3-23/RAC2/MARCO/FCGR2B/IGHV3-21/XKR4/IGHV4-28/CD300A/APPL2/BIN2/RHOG/MFGE8/NCKAP1L
GO:0002718	regulation of cytokine production involved in immune response	1.20173e-06	3.19986e-05	16	PLCG2/IL1B/CD36/LAPTM5/BTK/SASH3/CLC/TNFRSF1B/WNT5A/TNF/LILRB1/NOD2/TGFB3/LILRB4/TRPM4/CLEC7A
GO:0002220	innate immune response activating cell surface receptor signaling pathway	1.21511e-06	3.21732e-05	8	PLCG2/TYROBP/FCN1/LYN/SYK/LILRA2/CLEC7A/PAK3
GO:0050851	antigen receptor-mediated signaling pathway	1.28911e-06	3.39417e-05	27	IGKC/IGHM/PLCG2/LAPTM5/BLNK/MNDA/IGHV3-23/BTK/LPXN/FCGR2B/LYN/IGHV3-21/IGHV4-28/VTCN1/CD300A/CD79B/PTPRC/PRAM1/PTPN6/SYK/EZR/LILRB4/PVRIG/NCKAP1L/LCP2/THEMIS2/LCK
GO:0070371	ERK1 and ERK2 cascade	1.31329e-06	3.43862e-05	33	CCL4/IGF1/IL1B/CSF1R/FN1/CD36/CCL8/CCR1/C5AR1/CD44/PYCARD/MARCO/GPR183/LYN/OXTR/EMILIN1/TNF/RASGRP1/PTPRC/NOD2/PTPN6/CCL19/GLIPR2/SYK/EZR/CCL21/CCL11/ARRB2/HAVCR2/CCL24/TBC1D10C/EPHA7/RPS6KA6
GO:0031294	lymphocyte costimulation	1.42773e-06	3.71763e-05	11	LILRB2/CD86/TNFSF13B/CD24/LYN/VAV1/PTPN6/CCL19/CCL21/LILRB4/LCK
GO:0032642	regulation of chemokine production	1.5966e-06	4.1345e-05	16	CXCL6/IL1B/CSF1R/TLR2/IL33/PYCARD/WNT5A/TNF/NOD2/TSLP/SYK/LILRB4/CD84/HAVCR2/CLEC7A/MYD88
GO:0031348	negative regulation of defense response	1.69106e-06	4.35516e-05	28	IGF1/VSIG4/SERPINF1/HCK/FGR/SLAMF8/MICB/FCGR2B/LYN/TNFRSF1B/SAMHD1/NLRC5/MMP12/LILRB1/AOAH/PTPRC/NOD2/SYK/METRNL/ARRB2/HAVCR2/TNFAIP8L2/ALOX5/NR1D2/FEM1A/TTLL12/CD200/SIGLEC10
GO:0002687	positive regulation of leukocyte migration	1.79188e-06	4.57859e-05	19	CCL4/CX3CR1/CSF1R/PLA2G7/CCL8/C3AR1/CCR1/C5AR1/SELP/PYCARD/RAC2/WNT5A/TNF/CCL19/CCL21/ITGA4/CCL24/PLVAP/NCKAP1L
GO:0001774	microglial cell activation	1.79724e-06	4.57859e-05	11	CX3CR1/TYROBP/C1QA/TLR1/ITGAM/C5AR1/TLR2/ITGB2/CLU/TNF/PTPRC
GO:0042100	B cell proliferation	1.83486e-06	4.6493e-05	16	TYROBP/MNDA/IL7R/BTK/TNFSF13B/SASH3/FCGR2B/GPR183/LYN/GAPT/CD300A/RASGRP1/BST1/CD180/PTPRC/NCKAP1L
GO:0032418	lysosome localization	1.89929e-06	4.78681e-05	14	ADGRE2/FGR/CHGA/BTK/RAC2/LYN/CD300A/RASGRP1/SYTL4/SYK/MILR1/CD84/PIK3CG/VAMP8
GO:0050830	defense response to Gram-positive bacterium	2.40953e-06	6.04048e-05	16	LYZ/MPEG1/CD36/C5AR1/TLR2/RNASE6/FGR/IL7R/CHGA/PYCARD/TNF/NOD2/HAVCR2/TRAV27/ROMO1/MYD88
GO:0032102	negative regulation of response to external stimulus	2.47731e-06	6.17138e-05	38	IGF1/VSIG4/SERPINF1/HCK/FGR/SERPINB2/GPR18/SLAMF8/MICB/FAP/FCGR2B/LYN/TNFRSF1B/WNT5A/SAMHD1/TNF/NLRC5/MMP12/ROBO2/LILRB1/AOAH/PTPRC/NOD2/SYK/METRNL/ARRB2/HAVCR2/TNFAIP8L2/LILRA2/ALOX5/NR1D2/EPHA4/FEM1A/RGMA/ALOX12/TTLL12/CD200/SIGLEC10
GO:0002700	regulation of production of molecular mediator of immune response	2.48793e-06	6.17138e-05	21	PLCG2/IL1B/CD36/LAPTM5/CD86/BTK/SASH3/FCGR2B/CLC/TNFRSF1B/WNT5A/TNF/LILRB1/PTPRC/NOD2/TGFB3/MSH2/LILRB4/TRPM4/CLEC7A/GPI
GO:0001911	negative regulation of leukocyte mediated cytotoxicity	2.60292e-06	6.38936e-05	8	CX3CR1/IL7R/FCGR2B/LILRB1/PTPRC/ARRB2/HAVCR2/NCKAP1L
GO:0002755	MyD88-dependent toll-like receptor signaling pathway	2.60292e-06	6.38936e-05	8	TLR1/TLR2/BTK/CD300LF/CD300A/TLR8/IRAK1/MYD88
GO:0050730	regulation of peptidyl-tyrosine phosphorylation	2.65977e-06	6.49506e-05	28	PLCG2/IGF1/SFRP2/CSF1R/CD36/HCLS1/ITGB2/CD44/CD24/LYN/SAMSN1/ADRA2A/TNF/CD300A/BST1/PTPRC/NOD2/FLT3/PTPN6/TSLP/SYK/LILRB4/ARRB2/CRLF1/MVP/EPHA7/EPHA4/CLEC7A
GO:0042060	wound healing	2.77407e-06	6.72992e-05	38	PLCG2/COL1A1/IGF1/FN1/CD36/PF4/FCER1G/SMOC2/COMP/PLEK/SELP/CD44/SERPINB2/CXCR4/DSP/FAP/LYN/VAV1/ADRA2A/WNT5A/TNF/MMP12/COL5A1/JAML/SYTL4/PTPN6/AXL/SYK/PLAUR/TGFB3/CDH3/HPSE/PIK3CG/TPM1/ALOX5/CLEC7A/ALOX12/LCK
GO:0150077	regulation of neuroinflammatory response	2.7845e-06	6.72992e-05	10	PLCG2/IGF1/IL1B/IL33/PTGS2/MMP9/TNFRSF1B/TNF/PTPRC/CD200
GO:1902563	regulation of neutrophil activation	2.99679e-06	7.20606e-05	6	ITGAM/ITGB2/FCGR2B/CD300A/PRAM1/SYK
GO:0018108	peptidyl-tyrosine phosphorylation	3.08231e-06	7.37408e-05	35	PLCG2/IGF1/SFRP2/CSF1R/CD36/HCK/HCLS1/ITGB2/CD44/FGR/CLK1/BTK/CD24/LYN/SAMSN1/ADRA2A/CLK4/TNF/CD300A/BST1/PTPRC/NOD2/FLT3/PTPN6/TSLP/AXL/SYK/LILRB4/ARRB2/CRLF1/MVP/EPHA7/EPHA4/CLEC7A/LCK
GO:0002285	lymphocyte activation involved in immune response	3.20414e-06	7.62683e-05	23	PLCG2/FCER1G/LCP1/IRF8/ITGAL/CD86/CD1C/DOCK11/FCGR2B/GPR183/GAPT/EOMES/CORO1A/APBB1IP/LILRB1/CD180/PTPRC/CCL19/CDH17/IL12RB1/MSH2/HAVCR2/NCKAP1L
GO:0006957	complement activation, alternative pathway	3.41882e-06	8.09692e-05	7	C3/VSIG4/C7/CFH/CFB/CFD/CFP
GO:0043281	regulation of cysteine-type endopeptidase activity involved in apoptotic process	3.46375e-06	8.16233e-05	24	SFRP2/LAPTM5/TNFSF15/CD44/PYCARD/PTGS2/MMP9/DHCR24/TNF/TNFAIP8/BID/LAMP3/CASP1/SYK/PLAUR/NLRP2/ARRB2/MICAL1/EPHA7/CLEC7A/UACA/ALOX12/LCK/GPI
GO:0032735	positive regulation of interleukin-12 production	3.55182e-06	8.32822e-05	10	PLCG2/CD36/LAPTM5/IRF8/TLR2/LTB/NOD2/CCL19/SYK/CLEC7A
GO:0045621	positive regulation of lymphocyte differentiation	3.57665e-06	8.34494e-05	16	LILRB2/IL7R/CD86/BTK/SASH3/RASGRP1/IL4I1/PTPRC/RUNX3/CCL19/AXL/IL12RB1/SYK/ZBTB1/LILRB4/NCKAP1L
GO:0018212	peptidyl-tyrosine modification	3.68526e-06	8.55598e-05	35	PLCG2/IGF1/SFRP2/CSF1R/CD36/HCK/HCLS1/ITGB2/CD44/FGR/CLK1/BTK/CD24/LYN/SAMSN1/ADRA2A/CLK4/TNF/CD300A/BST1/PTPRC/NOD2/FLT3/PTPN6/TSLP/AXL/SYK/LILRB4/ARRB2/CRLF1/MVP/EPHA7/EPHA4/CLEC7A/LCK
GO:0008037	cell recognition	3.95748e-06	9.14294e-05	25	IGKC/IGHM/FCN3/CRTAM/CD36/CNTN4/FCN1/VCAN/IGHV3-23/CXCR4/DOCK2/FOLR2/IGHV3-21/OPCML/IGHV4-28/NTM/ROBO2/CCL19/CCL21/HAVCR2/ROBO3/EPHA4/MFGE8/CLEC7A/OVGP1
GO:0043410	positive regulation of MAPK cascade	4.24041e-06	9.74881e-05	41	CCL4/PLCG2/IGF1/IL1B/CSF1R/CD36/CCL8/CCR1/C5AR1/LAPTM5/CD44/IGFBP6/PYCARD/MARCO/FCGR2B/CD24/GPR183/RASSF2/ADRA2A/WNT5A/TNF/FGF9/RASGRP1/LPAR1/PTPRC/NOD2/FLT3/CCL19/GLIPR2/SYK/CCL21/CCL11/FGD2/ARRB2/HAVCR2/PIK3CG/CCL24/EPHA4/IRAK1/CLEC7A/MYD88
GO:0030574	collagen catabolic process	4.49611e-06	0.000102865	10	MMP7/MMP1/CTSS/MMP2/ADAMTS3/FAP/MMP9/MMP12/MMP10/ADAMTS2
GO:0019882	antigen processing and presentation	4.6139e-06	0.00010505	16	LILRB2/IFI30/CTSV/FCER1G/CTSS/PYCARD/CD1C/FCGR2B/CD1D/CD8A/CLEC4A/NOD2/CCL19/CCL21/CD1B/HLA-DOB
GO:0033627	cell adhesion mediated by integrin	4.7805e-06	0.00010832	13	SFRP2/ITGB2/LPXN/LYN/COL16A1/PTPN6/MUC1/SYK/CCL21/ITGA4/PIK3CG/TESC/NCKAP1L
GO:0002710	negative regulation of T cell mediated immunity	5.14989e-06	0.000115816	8	IL7R/FCGR2B/LILRB1/IL4I1/PTPRC/NOD2/LILRB4/NCKAP1L
GO:0002218	activation of innate immune response	5.19493e-06	0.000115816	11	PLCG2/TYROBP/FCN1/HCK/MNDA/PYCARD/LYN/SYK/LILRA2/CLEC7A/PAK3
GO:0032613	interleukin-10 production	5.20963e-06	0.000115816	12	PLCG2/TYROBP/TLR2/PYCARD/SASH3/FCGR2B/LILRB1/NOD2/TSLP/SYK/LILRB4/CLEC7A
GO:0032653	regulation of interleukin-10 production	5.20963e-06	0.000115816	12	PLCG2/TYROBP/TLR2/PYCARD/SASH3/FCGR2B/LILRB1/NOD2/TSLP/SYK/LILRB4/CLEC7A
GO:0050869	negative regulation of B cell activation	5.27559e-06	0.000116732	9	TYROBP/LAPTM5/MNDA/BTK/FCGR2B/LYN/SAMSN1/CD300A/TBC1D10C
GO:0002221	pattern recognition receptor signaling pathway	5.34633e-06	0.000117744	21	PLCG2/CD36/FCN1/TLR1/CD14/CTSS/TLR2/LY96/BTK/LYN/CD300LF/CD300A/TLR8/NOD2/PIK3AP1/APPL2/ARRB2/HAVCR2/LILRA2/IRAK1/MYD88
GO:0045055	regulated exocytosis	5.85889e-06	0.000128432	25	ADGRE2/ITGAM/HCK/ANXA3/PLEK/ITGB2/FGR/SYT1/CHGA/BTK/RAC2/FCGR2B/LYN/ADRA2A/CORO1A/CD300A/RASGRP1/PRAM1/SYK/MILR1/CD84/MICAL1/PIK3CG/NCKAP1L/VAMP8
GO:0002707	negative regulation of lymphocyte mediated immunity	6.32116e-06	0.000137924	11	IL7R/FCGR2B/LILRB1/IL4I1/PTPRC/NOD2/PTPN6/LILRB4/ARRB2/HAVCR2/NCKAP1L
GO:0002455	humoral immune response mediated by circulating immunoglobulin	6.35768e-06	0.000138082	17	IGKC/IGHM/C1QB/C3/C7/C1QA/C1QC/CLU/IGHV3-23/FCGR2B/IGHV3-21/IGHV4-28/TNF/C1R/PTPRC/NOD2/PTPN6
GO:0045619	regulation of lymphocyte differentiation	6.42013e-06	0.000138799	21	CRTAM/LILRB2/IL7R/SLAMF8/CD86/BTK/SASH3/RASGRP1/CD2/IL4I1/PTPRC/RUNX3/PTPN6/CCL19/AXL/IL12RB1/SYK/ZBTB1/LILRB4/NCKAP1L/KAT2A
GO:0006801	superoxide metabolic process	6.55554e-06	0.000141079	13	CYBB/TYROBP/CD36/NCF2/FBLN5/ITGAM/ITGB2/BST1/SYK/NCF4/BMP7/CLEC7A/ALOX12
GO:0150076	neuroinflammatory response	7.05267e-06	0.000150417	10	PLCG2/IGF1/IL1B/IL33/PTGS2/MMP9/TNFRSF1B/TNF/PTPRC/CD200
GO:0036037	CD8-positive, alpha-beta T cell activation	7.06303e-06	0.000150417	8	CRTAM/GPR18/EOMES/LILRB1/CLEC4A/RUNX3/LILRB4/NCKAP1L
GO:0002688	regulation of leukocyte chemotaxis	7.1171e-06	0.000150417	17	CCL4/CX3CR1/CSF1R/PLA2G7/C3AR1/CCR1/C5AR1/GPR18/SLAMF8/RAC2/LYN/WNT5A/BST1/NOD2/CCL19/CCL21/NCKAP1L
GO:0050868	negative regulation of T cell activation	7.1171e-06	0.000150417	17	VSIG4/CRTAM/LILRB2/LAPTM5/CD86/FCGR2B/VTCN1/CD300A/LILRB1/IL4I1/RUNX3/PTPN6/PAG1/LILRB4/HAVCR2/TNFAIP8L2/NCKAP1L
GO:0030888	regulation of B cell proliferation	7.36148e-06	0.000154887	12	TYROBP/MNDA/BTK/TNFSF13B/SASH3/FCGR2B/GPR183/LYN/CD300A/BST1/PTPRC/NCKAP1L
GO:0060759	regulation of response to cytokine stimulus	7.52184e-06	0.000157557	20	LAPTM5/TLR2/CCDC3/CXCR4/PYCARD/CD24/CD300LF/WNT5A/SAMHD1/NLRC5/MMP12/IL1RN/PTPRC/PTPN6/TSLP/AXL/CASP1/SYK/IRAK1/TTLL12
GO:0002577	regulation of antigen processing and presentation	7.76432e-06	0.000161917	7	LILRB2/PYCARD/FCGR2B/NOD2/CCL19/CCL21/HLA-DOB
GO:0001959	regulation of cytokine-mediated signaling pathway	8.69759e-06	0.000179996	19	LAPTM5/CCDC3/CXCR4/PYCARD/CD24/CD300LF/WNT5A/SAMHD1/NLRC5/MMP12/IL1RN/PTPRC/PTPN6/TSLP/AXL/CASP1/SYK/IRAK1/TTLL12
GO:0002920	regulation of humoral immune response	8.74581e-06	0.000179996	10	C3/VSIG4/IL1B/CD5L/CFH/FCGR2B/TNF/PTPRC/NOD2/PTPN6
GO:0035987	endodermal cell differentiation	8.74581e-06	0.000179996	10	FN1/MMP2/ITGB2/MMP9/EOMES/COL5A1/LAMB3/ITGA4/COL11A1/ITGA7
GO:0090322	regulation of superoxide metabolic process	8.81368e-06	0.000180604	9	TYROBP/CD36/FBLN5/ITGAM/ITGB2/BST1/SYK/BMP7/CLEC7A
GO:0002821	positive regulation of adaptive immune response	9.52891e-06	0.000193874	16	C3/IL1B/PYCARD/BTK/TNFSF13B/SASH3/CD1C/CD1D/TNF/PTPRC/NOD2/IL12RB1/CD1B/MSH2/ZBTB1/CLEC7A
GO:0031342	negative regulation of cell killing	9.54354e-06	0.000193874	8	CX3CR1/IL7R/FCGR2B/LILRB1/PTPRC/ARRB2/HAVCR2/NCKAP1L
GO:0002573	myeloid leukocyte differentiation	1.03368e-05	0.000209088	23	TYROBP/CSF1R/PF4/CCR1/EVI2B/C1QC/HCLS1/TLR2/DHRS2/MMP9/GPR183/RASSF2/LYN/L3MBTL3/CITED2/TCIRG1/TNF/LILRB1/CCL19/FSTL3/LILRB4/TESC/LILRB3
GO:0002708	positive regulation of lymphocyte mediated immunity	1.06963e-05	0.000215434	16	C3/IL1B/CRTAM/BTK/SASH3/CD1C/VAV1/CD1D/TNF/RASGRP1/PTPRC/NOD2/IL12RB1/CD1B/MSH2/ZBTB1
GO:0022408	negative regulation of cell-cell adhesion	1.2623e-05	0.000253159	22	VSIG4/CRTAM/LILRB2/LAPTM5/FXYD5/CD86/FCGR2B/VTCN1/CD300A/LILRB1/IL4I1/IL1RN/RUNX3/PTPN6/CCL21/PAG1/LILRB4/HAVCR2/TNFAIP8L2/EPB41L5/NCKAP1L/ALOX12
GO:0030100	regulation of endocytosis	1.3079e-05	0.000261192	23	PLCG2/APOC1/C3/CD36/CD14/CLU/DNM1/SFRP4/WNT5A/CD300A/LILRB1/MCTP1/CCL19/AXL/SYK/CCL21/APPL2/ARRB2/PRKD1/MAGI2/NCKAP1L/STON2/MIB1
GO:0019884	antigen processing and presentation of exogenous antigen	1.3206e-05	0.000262616	10	IFI30/CTSV/FCER1G/CTSS/CD1C/FCGR2B/CD1D/CLEC4A/CD1B/HLA-DOB
GO:1903038	negative regulation of leukocyte cell-cell adhesion	1.33719e-05	0.000264797	18	VSIG4/CRTAM/LILRB2/LAPTM5/CD86/FCGR2B/VTCN1/CD300A/LILRB1/IL4I1/RUNX3/PTPN6/CCL21/PAG1/LILRB4/HAVCR2/TNFAIP8L2/NCKAP1L
GO:0006887	exocytosis	1.38692e-05	0.000273496	32	CCL8/ADGRE2/ITGAM/HCK/CCR1/ANXA3/PLEK/ITGB2/FGR/SYT1/CHGA/BTK/RAC2/FCGR2B/LYN/ADRA2A/CORO1A/CD300A/EXPH5/RASGRP1/SYTL4/PRAM1/SYK/MILR1/MYO1G/CD84/MICAL1/PIK3CG/SCFD2/NCKAP1L/VAMP8/RAB33B
GO:0009595	detection of biotic stimulus	1.42058e-05	0.000278966	9	CRTAM/TLR1/TLR2/LY96/FAP/CD1D/NOD2/DACH1/CLEC7A
GO:0045582	positive regulation of T cell differentiation	1.44058e-05	0.000281721	14	LILRB2/IL7R/CD86/SASH3/RASGRP1/IL4I1/PTPRC/RUNX3/CCL19/IL12RB1/SYK/ZBTB1/LILRB4/NCKAP1L
GO:0060099	regulation of phagocytosis, engulfment	1.4641e-05	0.000285136	6	PLCG2/C3/CD36/CD300A/APPL2/NCKAP1L
GO:0046631	alpha-beta T cell activation	1.53614e-05	0.000297936	19	CRTAM/GPR18/DOCK2/CD86/SASH3/GPR183/EOMES/TCIRG1/CD300A/LILRB1/CLEC4A/PTPRC/RUNX3/CCL19/IL12RB1/SYK/LILRB4/EBI3/NCKAP1L
GO:0033628	regulation of cell adhesion mediated by integrin	1.60897e-05	0.000310781	10	SFRP2/LPXN/LYN/PTPN6/MUC1/SYK/CCL21/PIK3CG/TESC/NCKAP1L
GO:0006898	receptor-mediated endocytosis	1.64198e-05	0.000315864	25	PLCG2/APOC1/C3/CD36/MRC1/FCER1G/ITGAM/CD14/ITGB2/CLU/DNM1/MARCO/FCGR2B/SFRP4/SIGLEC1/LILRB1/STAB1/CCL19/SYK/EZR/CCL21/ITGA4/LILRB4/ARRB2/MAGI2
GO:0043304	regulation of mast cell degranulation	1.67413e-05	0.000318197	8	ADGRE2/FGR/RAC2/LYN/CD300A/SYK/CD84/VAMP8
GO:0050858	negative regulation of antigen receptor-mediated signaling pathway	1.67413e-05	0.000318197	8	LAPTM5/LPXN/FCGR2B/CD300A/PTPN6/EZR/LILRB4/PVRIG
GO:0072676	lymphocyte migration	1.67436e-05	0.000318197	16	CCL4/CRTAM/CCL8/ITGAL/PYCARD/GPR183/WNT5A/CCL19/CCL21/CCL11/ITGA4/MYO1G/PIK3CG/CCL24/CD200/CKLF
GO:0001914	regulation of T cell mediated cytotoxicity	1.78179e-05	0.000337252	9	IL7R/CD1C/FCGR2B/CD1D/LILRB1/PTPRC/IL12RB1/CD1B/NCKAP1L
GO:0007015	actin filament organization	1.84251e-05	0.00034735	37	TACSTD2/LCP1/HCK/GPR65/HCLS1/PLEK/MARCKS/PYCARD/ACTN1/PSTPIP2/RAC2/CORO1A/MYO1F/PLEKHH2/CAPG/LPAR1/AP1AR/GAS7/COTL1/EZR/CCL21/TGFB3/CCL11/ARPC1B/MYO5C/MYO1G/MICAL1/FMN2/RHOG/TPM1/CORO1C/CCL24/ARFIP2/NCKAP1L/PPP1R9A/TTC8/PAK3
GO:0002820	negative regulation of adaptive immune response	1.86596e-05	0.00035037	11	IL7R/FCGR2B/SAMSN1/LILRB1/IL4I1/PTPRC/NOD2/PTPN6/LILRB4/HAVCR2/NCKAP1L
GO:0022604	regulation of cell morphogenesis	1.92391e-05	0.000359816	29	CSF1R/FN1/TACSTD2/HCK/ITGB2/CD44/LST1/FGR/SYT1/CXCR4/RAC2/ARHGAP15/WNT5A/CORO1A/LPAR1/AP1AR/EZR/CCL11/FGD2/RHOG/FBLIM1/TPM1/CORO1C/CCL24/EPHA4/ITGA7/CPNE5/SS18L1/PAK3
GO:0052547	regulation of peptidase activity	2.11294e-05	0.000393608	38	COL6A3/C3/SFRP2/FN1/SERPINF1/WFDC2/LAPTM5/CSTA/TNFSF15/CD44/SERPINB2/PYCARD/PCOLCE/PTGS2/MMP9/LYN/DHCR24/TNF/CST6/RARRES1/TNFAIP8/BID/LAMP3/CASP1/SYK/PLAUR/NLRP2/ARRB2/MICAL1/SIMC1/EPHA7/EPHA4/CLEC7A/UACA/ALOX12/CSTB/LCK/GPI
GO:0001915	negative regulation of T cell mediated cytotoxicity	2.14118e-05	0.00039574	5	IL7R/FCGR2B/LILRB1/PTPRC/NCKAP1L
GO:0002765	immune response-inhibiting signal transduction	2.14118e-05	0.00039574	5	LILRB2/LYN/LILRB1/LILRB4/CD33
GO:0033006	regulation of mast cell activation involved in immune response	2.17789e-05	0.000400953	8	ADGRE2/FGR/RAC2/LYN/CD300A/SYK/CD84/VAMP8
GO:0002824	positive regulation of adaptive immune response based on somatic recombination of immune receptors built from immunoglobulin superfamily domains	2.26327e-05	0.000413476	15	C3/IL1B/BTK/TNFSF13B/SASH3/CD1C/CD1D/TNF/PTPRC/NOD2/IL12RB1/CD1B/MSH2/ZBTB1/CLEC7A
GO:1905153	regulation of membrane invagination	2.26346e-05	0.000413476	6	PLCG2/C3/CD36/CD300A/APPL2/NCKAP1L
GO:2000116	regulation of cysteine-type endopeptidase activity	2.54247e-05	0.00046265	24	SFRP2/LAPTM5/TNFSF15/CD44/PYCARD/PTGS2/MMP9/DHCR24/TNF/TNFAIP8/BID/LAMP3/CASP1/SYK/PLAUR/NLRP2/ARRB2/MICAL1/EPHA7/CLEC7A/UACA/ALOX12/LCK/GPI
GO:0001704	formation of primary germ layer	2.56554e-05	0.000465054	16	SFRP2/FN1/MMP2/ITGB2/MMP9/WNT5A/EOMES/COL5A1/LAMB3/ITGA4/COL11A1/EPB41L5/BMP7/ITGA7/SIX2/GPI
GO:0090022	regulation of neutrophil chemotaxis	2.80282e-05	0.000506118	8	C3AR1/C5AR1/RAC2/BST1/NOD2/CCL19/CCL21/NCKAP1L
GO:0031334	positive regulation of protein-containing complex assembly	2.92119e-05	0.00052548	24	PLCG2/CD36/LCP1/MMP1/HCK/PLEK/CLU/PYCARD/TPPP2/TNF/CORO1A/GBP5/AP1AR/BID/CDH17/SYK/CCL21/CCL11/ARPC1B/CCL24/ARFIP2/NCKAP1L/CLEC7A/MYD88
GO:0030168	platelet activation	3.15186e-05	0.000564819	16	PLCG2/FN1/PF4/FCER1G/COMP/PLEK/SELP/LYN/VAV1/ADRA2A/PTPN6/AXL/SYK/PIK3CG/ALOX12/LCK
GO:0050920	regulation of chemotaxis	3.18811e-05	0.00056915	23	CCL4/CX3CR1/CSF1R/PLA2G7/C3AR1/SMOC2/CCR1/C5AR1/GPR18/SLAMF8/CXCR4/TUBB2B/RAC2/GPR183/LYN/WNT5A/ROBO2/BST1/NOD2/CCL19/CCL21/PRKD1/NCKAP1L
GO:0010934	macrophage cytokine production	3.38004e-05	0.000598878	6	PLCG2/CD36/LAPTM5/WNT5A/LILRB1/TGFB3
GO:0010935	regulation of macrophage cytokine production	3.38004e-05	0.000598878	6	PLCG2/CD36/LAPTM5/WNT5A/LILRB1/TGFB3
GO:0050854	regulation of antigen receptor-mediated signaling pathway	3.55054e-05	0.00062673	11	LAPTM5/LPXN/FCGR2B/LYN/CD300A/PTPRC/PTPN6/EZR/LILRB4/PVRIG/LCK
GO:0002335	mature B cell differentiation	3.57105e-05	0.000627999	8	PLCG2/IRF8/SLAMF8/DOCK11/FCGR2B/GPR183/CMTM7/CDH17
GO:0048872	homeostasis of number of cells	3.75011e-05	0.000655375	26	CXCL6/CX3CR1/HCLS1/IL7R/TNFSF13B/SASH3/DOCK11/GPR183/RASSF2/LYN/L3MBTL3/GAPT/CITED2/TCIRG1/CORO1A/FLT3/AXL/ALAS2/LIPA/FOXA3/NCKAP1L/SMAD5/TNFRSF17/HOXA5/GPI/GCNT4
GO:0043312	neutrophil degranulation	3.79625e-05	0.000655375	5	ITGAM/ANXA3/ITGB2/PRAM1/SYK
GO:0046643	regulation of gamma-delta T cell activation	3.79625e-05	0.000655375	5	LILRB1/PTPRC/NOD2/SYK/NCKAP1L
GO:0097048	dendritic cell apoptotic process	3.79625e-05	0.000655375	5	LYN/LILRB1/CCL19/AXL/CCL21
GO:2000668	regulation of dendritic cell apoptotic process	3.79625e-05	0.000655375	5	LYN/LILRB1/CCL19/AXL/CCL21
GO:0002861	regulation of inflammatory response to antigenic stimulus	4.10931e-05	0.000706831	9	C3/HCK/FGR/BTK/FCGR2B/LYN/TNF/NOD2/SYK
GO:0008360	regulation of cell shape	4.45246e-05	0.000763071	18	CSF1R/FN1/HCK/ITGB2/LST1/FGR/RAC2/ARHGAP15/CORO1A/LPAR1/EZR/CCL11/FGD2/RHOG/FBLIM1/TPM1/CCL24/ITGA7
GO:0070098	chemokine-mediated signaling pathway	4.49862e-05	0.000766928	13	CCL4/PPBP/CXCL6/CX3CR1/CCL8/PF4/CCR1/CXCR4/CCR5/CCL19/CCL21/CCL11/CCL24
GO:0002446	neutrophil mediated immunity	4.50751e-05	0.000766928	8	CXCL6/ITGAM/ANXA3/ITGB2/PRAM1/SYK/TREM1/MYD88
GO:0001818	negative regulation of cytokine production	4.54853e-05	0.000771124	31	CX3CR1/IGF1/VSIG4/TYROBP/FN1/LAPTM5/GPR18/PYCARD/BTK/FCGR2B/CD24/TNF/LILRB1/CLEC4A/TLR8/PTPRC/NOD2/PTPN6/AXL/ABCD1/EZR/APPL2/TGFB3/CDH3/LILRB4/ARRB2/CD84/HAVCR2/NCKAP1L/CD33/CD200
GO:0001503	ossification	4.57114e-05	0.000772179	34	COL1A2/COL1A1/CTHRC1/IGF1/SFRP2/CLEC5A/CCR1/COMP/MMP2/VCAN/ASPN/FGR/PTGS2/MMP9/RASSF2/CDH11/WNT5A/TCIRG1/TNF/TMEM38B/RUNX3/TGFB3/TOB1/FSTL3/TMEM119/COL11A1/ALOX5/FIGNL1/PRKD1/BMP7/TRPM4/SMAD5/SIX2/SATB2
GO:0001706	endoderm formation	4.74131e-05	0.000795224	10	FN1/MMP2/ITGB2/MMP9/EOMES/COL5A1/LAMB3/ITGA4/COL11A1/ITGA7
GO:0002823	negative regulation of adaptive immune response based on somatic recombination of immune receptors built from immunoglobulin superfamily domains	4.74131e-05	0.000795224	10	IL7R/FCGR2B/LILRB1/IL4I1/PTPRC/NOD2/PTPN6/LILRB4/HAVCR2/NCKAP1L
GO:0002223	stimulatory C-type lectin receptor signaling pathway	4.89913e-05	0.000807328	6	PLCG2/TYROBP/LYN/SYK/CLEC7A/PAK3
GO:0030889	negative regulation of B cell proliferation	4.89913e-05	0.000807328	6	TYROBP/MNDA/BTK/FCGR2B/LYN/CD300A
GO:0034134	toll-like receptor 2 signaling pathway	4.89913e-05	0.000807328	6	TLR1/TLR2/LYN/NOD2/PIK3AP1/IRAK1
GO:1990840	response to lectin	4.89913e-05	0.000807328	6	PLCG2/TYROBP/LYN/SYK/CLEC7A/PAK3
GO:1990858	cellular response to lectin	4.89913e-05	0.000807328	6	PLCG2/TYROBP/LYN/SYK/CLEC7A/PAK3
GO:0042554	superoxide anion generation	4.98463e-05	0.000818556	9	CYBB/TYROBP/NCF2/ITGAM/ITGB2/SYK/NCF4/CLEC7A/ALOX12
GO:0071675	regulation of mononuclear cell migration	5.35348e-05	0.000876075	15	CCL4/CX3CR1/CSF1R/PLA2G7/C3AR1/CCR1/C5AR1/SLAMF8/PYCARD/LYN/WNT5A/TNF/CCL21/ITGA4/CD200
GO:0043154	negative regulation of cysteine-type endopeptidase activity involved in apoptotic process	5.83799e-05	0.000952056	12	SFRP2/CD44/PTGS2/MMP9/DHCR24/TNF/TNFAIP8/LAMP3/PLAUR/ARRB2/MICAL1/GPI
GO:0070374	positive regulation of ERK1 and ERK2 cascade	6.09586e-05	0.000990683	22	CCL4/IGF1/CSF1R/CD36/CCL8/CCR1/C5AR1/CD44/PYCARD/MARCO/GPR183/TNF/RASGRP1/PTPRC/NOD2/CCL19/GLIPR2/CCL21/CCL11/ARRB2/HAVCR2/CCL24
GO:0019722	calcium-mediated signaling	6.18679e-05	0.001002	21	CCL4/PLCG2/CX3CR1/IGF1/CCR1/PLEK/SELP/CXCR4/BTK/CCR5/P2RX5/TNF/TMEM38B/BST1/PTPRC/MCTP1/SYK/TBC1D10C/TRPM4/PPP1R9A/CLEC7A
GO:0031589	cell-substrate adhesion	6.21982e-05	0.0010039	31	COL1A1/FN1/CD36/MSLN/FBLN5/TACSTD2/LYVE1/ITGB2/CD44/ITGAL/ACTN1/RAC2/LPXN/EMILIN1/COL16A1/CORO1A/MMP12/SIGLEC1/LAMB3/LAMC3/BST1/AP1AR/AXL/CCL21/ITGA4/MYO1G/HPSE/CORO1C/EPB41L5/ITGA7/AGR2
GO:0060907	positive regulation of macrophage cytokine production	6.2938e-05	0.0010058	5	PLCG2/CD36/LAPTM5/WNT5A/LILRB1
GO:0071635	negative regulation of transforming growth factor beta production	6.2938e-05	0.0010058	5	TYROBP/FN1/CD24/LILRB1/CDH3
GO:0052548	regulation of endopeptidase activity	6.29561e-05	0.0010058	35	COL6A3/C3/SFRP2/SERPINF1/WFDC2/LAPTM5/CSTA/TNFSF15/CD44/SERPINB2/PYCARD/PTGS2/MMP9/LYN/DHCR24/TNF/CST6/RARRES1/TNFAIP8/BID/LAMP3/CASP1/SYK/PLAUR/NLRP2/ARRB2/MICAL1/EPHA7/EPHA4/CLEC7A/UACA/ALOX12/CSTB/LCK/GPI
GO:0001912	positive regulation of leukocyte mediated cytotoxicity	6.56442e-05	0.00104521	10	TYROBP/CRTAM/ITGAM/CD1C/VAV1/CD1D/RASGRP1/PTPRC/IL12RB1/CD1B
GO:0032703	negative regulation of interleukin-2 production	6.96449e-05	0.00110517	7	VSIG4/LAPTM5/PTPRC/NOD2/EZR/LILRB4/HAVCR2
GO:0071346	cellular response to interferon-gamma	7.2332e-05	0.00114396	15	CCL4/CCL8/MRC1/HCK/IRF8/TLR2/WNT5A/NLRC5/GBP5/CCL19/CASP1/IL12RB1/CCL21/CCL11/CCL24
GO:0045580	regulation of T cell differentiation	7.54624e-05	0.00118948	17	CRTAM/LILRB2/IL7R/CD86/SASH3/RASGRP1/CD2/IL4I1/PTPRC/RUNX3/CCL19/IL12RB1/SYK/ZBTB1/LILRB4/NCKAP1L/KAT2A
GO:0060760	positive regulation of response to cytokine stimulus	7.67963e-05	0.00120647	10	LAPTM5/TLR2/CXCR4/CD300LF/WNT5A/NLRC5/MMP12/TSLP/AXL/CASP1
GO:0050728	negative regulation of inflammatory response	8.24824e-05	0.00129149	19	IGF1/SERPINF1/HCK/FGR/SLAMF8/FCGR2B/LYN/TNFRSF1B/AOAH/PTPRC/NOD2/SYK/METRNL/TNFAIP8L2/ALOX5/NR1D2/FEM1A/CD200/SIGLEC10
GO:1901224	positive regulation of NIK/NF-kappaB signaling	8.45981e-05	0.00132023	11	IL1B/CD14/LAPTM5/TLR2/CD86/TNF/NOD2/NR3C2/CCL19/HAVCR2/IRAK1
GO:0007599	hemostasis	8.56111e-05	0.00133163	22	PLCG2/FN1/CD36/PF4/FCER1G/COMP/PLEK/SELP/SERPINB2/FAP/LYN/VAV1/ADRA2A/PTPN6/AXL/SYK/PLAUR/HPSE/PIK3CG/ALOX12/LCK/GPI
GO:0097028	dendritic cell differentiation	8.6078e-05	0.00133449	9	LILRB2/IRF8/DHRS2/FCGR2B/LYN/LILRB1/FLT3/CCL19/AXL
GO:0007204	positive regulation of cytosolic calcium ion concentration	8.70045e-05	0.00134443	28	PLCG2/CX3CR1/CD52/CD36/C3AR1/FPR3/GPR65/CCR1/C5AR1/GPR18/CXCR4/CD24/LYN/OXTR/CCR5/P2RX5/CORO1A/GNA15/LPAR1/TMEM38B/PTPRC/PTPN6/CCL19/CCL21/PIK3CG/PRKD1/TRPM4/LCK
GO:0043405	regulation of MAP kinase activity	8.90228e-05	0.00137113	19	IL1B/SFRP2/CD24/LYN/ADRA2A/WNT5A/TNF/CD300A/RASGRP1/NOD2/FLT3/PTPN6/CCL19/SYK/FGD2/PIK3CG/EPHA4/IRAK1/BMP7
GO:0002548	monocyte chemotaxis	9.68003e-05	0.00148606	11	CCL4/CX3CR1/PLA2G7/CCL8/CCR1/SLAMF8/LYN/CCL19/CCL21/CCL11/CCL24
GO:0060100	positive regulation of phagocytosis, engulfment	9.89135e-05	0.00150867	5	PLCG2/C3/CD36/APPL2/NCKAP1L
GO:1905155	positive regulation of membrane invagination	9.89135e-05	0.00150867	5	PLCG2/C3/CD36/APPL2/NCKAP1L
GO:0097242	amyloid-beta clearance	0.000105407	0.00160252	8	C3/CD36/ITGAM/C5AR1/ITGB2/CLU/MARCO/TNF
GO:1903305	regulation of regulated secretory pathway	0.000107601	0.00163062	16	ADGRE2/ITGAM/ITGB2/FGR/SYT1/RAC2/FCGR2B/LYN/ADRA2A/CD300A/PRAM1/SYK/CD84/MICAL1/NCKAP1L/VAMP8
GO:0043254	regulation of protein-containing complex assembly	0.000111744	0.00168798	34	PLCG2/CD36/LCP1/MMP1/HCK/HCLS1/PLEK/DACT1/SELP/CLU/PYCARD/TPPP2/TNF/CORO1A/CAPG/GBP5/AP1AR/COTL1/BID/CDH17/SYK/CCL21/EIF4EBP1/CCL11/ARPC1B/FBLIM1/CCL24/ARFIP2/NCKAP1L/PPP1R9A/CLEC7A/MYD88/TMC8/PAK3
GO:0060048	cardiac muscle contraction	0.000117408	0.00176786	16	CHGA/CXCR4/DSP/KCNJ8/TNNI1/TMEM38B/ASB3/SCN4B/PIK3CG/TPM1/MYL3/KCNH2/TRPM4/SMAD5/SCN1B/SCN2B
GO:0002440	production of molecular mediator of immune response	0.00011811	0.00177278	27	IGKC/PLCG2/IL1B/CD36/LAPTM5/IGLV2-14/CD86/BTK/SASH3/FCGR2B/CLC/GAPT/TNFRSF1B/WNT5A/SAMHD1/TNF/LILRB1/PTPRC/NOD2/TGFB3/MSH2/LILRB4/HLA-DOB/TRPM4/TREM1/CLEC7A/GPI
GO:0001913	T cell mediated cytotoxicity	0.000120843	0.00180805	9	IL7R/CD1C/FCGR2B/CD1D/LILRB1/PTPRC/IL12RB1/CD1B/NCKAP1L
GO:1990868	response to chemokine	0.00012562	0.00186765	13	CCL4/PPBP/CXCL6/CX3CR1/CCL8/PF4/CCR1/CXCR4/CCR5/CCL19/CCL21/CCL11/CCL24
GO:1990869	cellular response to chemokine	0.00012562	0.00186765	13	CCL4/PPBP/CXCL6/CX3CR1/CCL8/PF4/CCR1/CXCR4/CCR5/CCL19/CCL21/CCL11/CCL24
GO:0001961	positive regulation of cytokine-mediated signaling pathway	0.00014221	0.00210765	9	LAPTM5/CXCR4/CD300LF/WNT5A/NLRC5/MMP12/TSLP/AXL/CASP1
GO:0043374	CD8-positive, alpha-beta T cell differentiation	0.000148815	0.00219724	5	GPR18/EOMES/RUNX3/LILRB4/NCKAP1L
GO:0043406	positive regulation of MAP kinase activity	0.000149653	0.00219724	14	IL1B/CD24/ADRA2A/WNT5A/TNF/RASGRP1/NOD2/FLT3/CCL19/SYK/FGD2/PIK3CG/EPHA4/IRAK1
GO:1901222	regulation of NIK/NF-kappaB signaling	0.000149653	0.00219724	14	IL1B/CD14/LAPTM5/TLR2/CD86/RASSF2/TNF/NOD2/NR3C2/CCL19/HAVCR2/IRAK1/BMP7/UACA
GO:0030099	myeloid cell differentiation	0.000150706	0.00220582	31	TYROBP/CSF1R/PF4/CCR1/EVI2B/C1QC/HCLS1/IRF8/TLR2/DHRS2/ACTN1/MMP9/GPR183/RASSF2/LYN/L3MBTL3/CITED2/TCIRG1/TNF/GPR171/LILRB1/PTPN6/CCL19/ALAS2/FSTL3/LILRB4/TESC/NCKAP1L/SMAD5/LILRB3/HOXA5
GO:2000117	negative regulation of cysteine-type endopeptidase activity	0.000153586	0.00224102	12	SFRP2/CD44/PTGS2/MMP9/DHCR24/TNF/TNFAIP8/LAMP3/PLAUR/ARRB2/MICAL1/GPI
GO:0002437	inflammatory response to antigenic stimulus	0.000161786	0.00235338	11	C3/HCK/FGR/BTK/FCGR2B/LYN/TNF/RASGRP1/IL1RN/NOD2/SYK
GO:0071622	regulation of granulocyte chemotaxis	0.000166639	0.00241652	9	CSF1R/C3AR1/C5AR1/RAC2/BST1/NOD2/CCL19/CCL21/NCKAP1L
GO:0007596	blood coagulation	0.000171688	0.00247607	21	PLCG2/FN1/CD36/PF4/FCER1G/COMP/PLEK/SELP/SERPINB2/FAP/LYN/VAV1/ADRA2A/PTPN6/AXL/SYK/PLAUR/HPSE/PIK3CG/ALOX12/LCK
GO:0001776	leukocyte homeostasis	0.000171796	0.00247607	12	CXCL6/TNFSF13B/DOCK11/GPR183/LYN/GAPT/TCIRG1/CORO1A/FLT3/AXL/NCKAP1L/TNFRSF17
GO:0002286	T cell activation involved in immune response	0.000180952	0.00260007	14	FCER1G/LCP1/ITGAL/CD86/CD1C/FCGR2B/GPR183/EOMES/APBB1IP/LILRB1/CCL19/IL12RB1/HAVCR2/NCKAP1L
GO:0022617	extracellular matrix disassembly	0.000183189	0.00262423	10	MMP7/CTSV/LCP1/MMP1/CTSS/MMP2/FAP/MMP9/MMP12/MMP10
GO:0032733	positive regulation of interleukin-10 production	0.000185266	0.00263795	8	PLCG2/TLR2/PYCARD/SASH3/NOD2/TSLP/SYK/CLEC7A
GO:0071634	regulation of transforming growth factor beta production	0.000185266	0.00263795	8	LUM/TYROBP/FN1/PTGS2/CD24/LILRB1/CDH3/CD200
GO:0050829	defense response to Gram-negative bacterium	0.000191819	0.00272302	12	IGHM/CXCL6/LYZ/MPEG1/RNASE6/SELP/CHGA/PYCARD/CASP1/PRKD1/TREM1/ROMO1
GO:0048260	positive regulation of receptor-mediated endocytosis	0.000194466	0.0027523	9	PLCG2/C3/CLU/SFRP4/CCL19/SYK/CCL21/ARRB2/MAGI2
GO:0051480	regulation of cytosolic calcium ion concentration	0.00020695	0.00292022	29	PLCG2/CX3CR1/CD52/CD36/C3AR1/FPR3/GPR65/CCR1/C5AR1/GPR18/CXCR4/CD24/LYN/OXTR/CCR5/P2RX5/WNT5A/CORO1A/GNA15/LPAR1/TMEM38B/PTPRC/PTPN6/CCL19/CCL21/PIK3CG/PRKD1/TRPM4/LCK
GO:0048247	lymphocyte chemotaxis	0.000209456	0.00294677	10	CCL4/CCL8/GPR183/WNT5A/CCL19/CCL21/CCL11/PIK3CG/CCL24/CKLF
GO:0002468	dendritic cell antigen processing and presentation	0.000215901	0.0030284	5	FCGR2B/CLEC4A/NOD2/CCL19/CCL21
GO:0050850	positive regulation of calcium-mediated signaling	0.000221798	0.0030927	7	CCL4/PLCG2/IGF1/P2RX5/TNF/SYK/CLEC7A
GO:1901889	negative regulation of cell junction assembly	0.000221798	0.0030927	7	IL1B/TLR2/WNT5A/TNF/ROBO2/CORO1C/EPHA7
GO:0072677	eosinophil migration	0.000224511	0.00312129	6	CCL4/CCL8/CD300A/CCL21/CCL11/CCL24
GO:0007492	endoderm development	0.000232044	0.00321654	11	FN1/MMP2/ITGB2/MMP9/EOMES/COL5A1/LAMB3/ITGA4/COL11A1/EPB41L5/ITGA7
GO:0050808	synapse organization	0.000233113	0.00322188	33	C1QB/CX3CR1/C3/THBS2/LILRB2/IL10RA/C1QA/GABRA2/ITGAM/SPARCL1/C5AR1/C1QC/TLR2/SRPX2/ACTN1/FCGR2B/OXTR/NEFL/CTTNBP2/WNT5A/IGSF21/TNF/ROBO2/SLITRK4/ZNF365/NEFH/CDC20/PPFIA4/EPHA7/EPHA4/PPP1R9A/PPFIBP2/PAK3
GO:0050817	coagulation	0.000235263	0.00324209	21	PLCG2/FN1/CD36/PF4/FCER1G/COMP/PLEK/SELP/SERPINB2/FAP/LYN/VAV1/ADRA2A/PTPN6/AXL/SYK/PLAUR/HPSE/PIK3CG/ALOX12/LCK
GO:0072593	reactive oxygen species metabolic process	0.00024871	0.00341741	22	PLCG2/CYBB/TYROBP/CD36/NCF2/FBLN5/ITGAM/ITGB2/RAC2/VAV1/PID1/TNF/BST1/ABCD1/SYK/NCF4/ALOX5/HBD/BMP7/ROMO1/CLEC7A/ALOX12
GO:0046634	regulation of alpha-beta T cell activation	0.000255298	0.00349773	13	CRTAM/CD86/SASH3/CD300A/LILRB1/PTPRC/RUNX3/CCL19/IL12RB1/SYK/LILRB4/EBI3/NCKAP1L
GO:0071604	transforming growth factor beta production	0.000262042	0.00357972	8	LUM/TYROBP/FN1/PTGS2/CD24/LILRB1/CDH3/CD200
GO:0043552	positive regulation of phosphatidylinositol 3-kinase activity	0.000271898	0.00370363	7	FGR/LYN/NOD2/FLT3/CCL19/CCL21/PRKD1
GO:0050731	positive regulation of peptidyl-tyrosine phosphorylation	0.000276929	0.00376129	19	PLCG2/IGF1/CSF1R/CD36/HCLS1/CD44/CD24/LYN/ADRA2A/TNF/PTPRC/NOD2/FLT3/TSLP/SYK/ARRB2/CRLF1/EPHA4/CLEC7A
GO:0002922	positive regulation of humoral immune response	0.000289301	0.00389564	6	C3/IL1B/FCGR2B/TNF/PTPRC/NOD2
GO:0038095	Fc-epsilon receptor signaling pathway	0.000289301	0.00389564	6	PLCG2/FCER1G/BTK/LYN/VAV1/SYK
GO:0090023	positive regulation of neutrophil chemotaxis	0.000289301	0.00389564	6	C3AR1/C5AR1/RAC2/CCL19/CCL21/NCKAP1L
GO:0014068	positive regulation of phosphatidylinositol 3-kinase signaling	0.000291968	0.00392036	11	IGF1/FN1/HCLS1/SELP/FGR/TNF/PIK3AP1/FLT3/PTPN6/PRR5L/HCST
GO:0034116	positive regulation of heterotypic cell-cell adhesion	0.00030375	0.00404399	5	IL1B/CD44/TNF/BMP7/LCK
GO:0051044	positive regulation of membrane protein ectodomain proteolysis	0.00030375	0.00404399	5	IL1B/ADRA2A/TNFRSF1B/TNF/RGMA
GO:0071639	positive regulation of monocyte chemotactic protein-1 production	0.00030375	0.00404399	5	IL1B/NOD2/SYK/CD84/CLEC7A
GO:0042130	negative regulation of T cell proliferation	0.000307934	0.00407667	10	VSIG4/CRTAM/LILRB2/CD86/VTCN1/LILRB1/IL4I1/PTPN6/LILRB4/HAVCR2
GO:0046635	positive regulation of alpha-beta T cell activation	0.000307934	0.00407667	10	CD86/SASH3/PTPRC/RUNX3/CCL19/IL12RB1/SYK/LILRB4/EBI3/NCKAP1L
GO:0046006	regulation of activated T cell proliferation	0.000309196	0.00408191	8	IGF1/CRTAM/PYCARD/CD24/CLC/IGFBP2/IL12RB1/LILRB4
GO:0002761	regulation of myeloid leukocyte differentiation	0.000310956	0.00409367	14	TYROBP/PF4/CCR1/EVI2B/C1QC/HCLS1/RASSF2/LYN/TNF/LILRB1/FSTL3/LILRB4/TESC/LILRB3
GO:0051051	negative regulation of transport	0.00032183	0.00422503	35	APOC1/IL1B/LILRB2/CD36/UCP2/TLR2/CHGA/PTGS2/MMP9/FCGR2B/SFRP4/OXTR/ADRA2A/CD300LF/TNFRSF1B/PID1/TNF/CORO1A/CD300A/LILRB1/VIP/SYTL4/MCTP1/APPL2/PRKG2/CD84/PRKD1/KCNH2/NCKAP1L/PPP1R9A/VAMP8/PPIF/CD33/CD200/RAB33B
GO:0002495	antigen processing and presentation of peptide antigen via MHC class II	0.000330704	0.00430555	7	IFI30/CTSV/FCER1G/CTSS/PYCARD/FCGR2B/HLA-DOB
GO:0032743	positive regulation of interleukin-2 production	0.000330704	0.00430555	7	PLCG2/IL1B/CD86/SASH3/VTCN1/PTPRC/CLEC7A
GO:0035590	purinergic nucleotide receptor signaling pathway	0.000330704	0.00430555	7	P2RY13/GPR34/P2RY14/P2RX5/ADORA3/GPR171/ADORA2B
GO:0031529	ruffle organization	0.00034733	0.00449716	9	CSF1R/TACSTD2/PLEK/TCIRG1/CCL21/RHOG/TPM1/CORO1C/ARFIP2
GO:1904645	response to amyloid-beta	0.00034733	0.00449716	9	IGF1/CD36/MMP2/DNM1/MMP9/FCGR2B/MMP12/ITGA4/EPHA4
GO:0072073	kidney epithelium development	0.000356264	0.0046002	15	PROM1/TACSTD2/BASP1/CD24/SALL1/FOXD1/ROBO2/CRLF1/ADAMTS16/EPHA7/EPHA4/BMP7/MAGI2/SMAD5/SIX2
GO:0002690	positive regulation of leukocyte chemotaxis	0.000358683	0.00461877	12	CCL4/CX3CR1/CSF1R/PLA2G7/C3AR1/CCR1/C5AR1/RAC2/WNT5A/CCL19/CCL21/NCKAP1L
GO:2000106	regulation of leukocyte apoptotic process	0.000364428	0.00467997	11	HCLS1/IL7R/BTK/LYN/WNT5A/LILRB1/NOD2/CCL19/AXL/CCL21/CD3G
GO:0033622	integrin activation	0.000367893	0.00468617	6	FN1/PLEK/SELP/COL16A1/CDH17/FBLIM1
GO:0098581	detection of external biotic stimulus	0.000367893	0.00468617	6	TLR1/TLR2/LY96/CD1D/NOD2/CLEC7A
GO:1904996	positive regulation of leukocyte adhesion to vascular endothelial cell	0.000367893	0.00468617	6	ITGB2/SELP/TNF/ITGA4/ALOX5/IRAK1
GO:0043087	regulation of GTPase activity	0.000370723	0.00470949	28	CCL4/CCL8/GPR65/PYCARD/DOCK11/VAV1/ARHGAP15/WNT5A/ADAP2/RASGRP1/ARHGAP9/CCL19/PKP4/CCL21/CCL11/FGD2/ARRB2/RHOG/CORO1C/STMN3/CCL24/TBC1D10C/EPHA4/RASGRP2/RGMA/TTC8/RABGAP1L/RAP1GAP2
GO:0009615	response to virus	0.000395343	0.0049891	29	CCL4/FCN3/APOBEC3A/CCL8/ACTA2/TLR2/RNASE6/FGR/CLU/MICB/CXCR4/PYCARD/RNASE2/KCNJ8/ISG20/SAMHD1/TNF/NLRC5/MMP12/ITGAX/LILRB1/TLR8/PTPRC/CCL19/IL12RB1/CCL11/VAMP8/MYD88/PRKRA
GO:0032479	regulation of type I interferon production	0.00039591	0.0049891	12	PLCG2/CD14/IRF8/TLR2/PYCARD/MMP12/LILRB1/TLR8/SYK/HAVCR2/IRAK1/MYD88
GO:0032606	type I interferon production	0.00039591	0.0049891	12	PLCG2/CD14/IRF8/TLR2/PYCARD/MMP12/LILRB1/TLR8/SYK/HAVCR2/IRAK1/MYD88
GO:0032604	granulocyte macrophage colony-stimulating factor production	0.000416229	0.00520341	5	IL1B/RASGRP1/SYK/CD84/LILRA2
GO:0032645	regulation of granulocyte macrophage colony-stimulating factor production	0.000416229	0.00520341	5	IL1B/RASGRP1/SYK/CD84/LILRA2
GO:0051797	regulation of hair follicle development	0.000416229	0.00520341	5	KRT17/WNT5A/TNF/CDH3/HPSE
GO:0002291	T cell activation via T cell receptor contact with antigen bound to MHC molecule on antigen presenting cell	0.000437671	0.00542828	4	ITGAL/APBB1IP/LILRB1/HAVCR2
GO:0002887	negative regulation of myeloid leukocyte mediated immunity	0.000437671	0.00542828	4	CX3CR1/FCGR2B/CD300A/CD84
GO:1905809	negative regulation of synapse organization	0.000437671	0.00542828	4	TLR2/WNT5A/ROBO2/EPHA7
GO:0045123	cellular extravasation	0.000442379	0.00547227	10	CX3CR1/SELP/ITGAL/TNF/JAML/BST1/CCL21/ITGA4/PIK3CG/PLVAP
GO:0007369	gastrulation	0.000457311	0.00564217	18	SFRP2/FN1/MMP2/ITGB2/MMP9/WNT5A/EOMES/TENM4/COL5A1/LAMB3/IL1RN/ITGA4/COL11A1/EPB41L5/BMP7/ITGA7/SIX2/GPI
GO:0008154	actin polymerization or depolymerization	0.000459938	0.00565975	20	HCK/HCLS1/PLEK/PYCARD/PSTPIP2/CORO1A/PLEKHH2/CAPG/AP1AR/GAS7/COTL1/CCL21/CCL11/ARPC1B/MICAL1/CCL24/ARFIP2/NCKAP1L/PPP1R9A/PAK3
GO:0034114	regulation of heterotypic cell-cell adhesion	0.000462235	0.00567322	6	IL1B/CD44/TNF/IL1RN/BMP7/LCK
GO:0002504	antigen processing and presentation of peptide or polysaccharide antigen via MHC class II	0.000478762	0.00586079	7	IFI30/CTSV/FCER1G/CTSS/PYCARD/FCGR2B/HLA-DOB
GO:1901214	regulation of neuron death	0.00048753	0.00595266	26	CX3CR1/TYROBP/C1QA/SERPINF1/ITGAM/C5AR1/ITGB2/CLU/CHGA/FCGR2B/NEFL/TNFRSF1B/WNT5A/DHCR24/TNF/CORO1A/AXL/TGFB3/MSH2/ARRB2/CRLF1/EPHA7/CPEB4/CD200/GPI/PAK3
GO:0017157	regulation of exocytosis	0.000491573	0.00598122	19	ADGRE2/ITGAM/ITGB2/FGR/SYT1/RAC2/FCGR2B/LYN/ADRA2A/CD300A/EXPH5/SYTL4/PRAM1/SYK/CD84/MICAL1/NCKAP1L/VAMP8/RAB33B
GO:0035850	epithelial cell differentiation involved in kidney development	0.000493676	0.00598122	8	PROM1/ACTA2/BASP1/MMP9/CD24/SALL1/MAGI2/SIX2
GO:0050798	activated T cell proliferation	0.000493676	0.00598122	8	IGF1/CRTAM/PYCARD/CD24/CLC/IGFBP2/IL12RB1/LILRB4
GO:0034341	response to interferon-gamma	0.000524808	0.00632588	15	CCL4/CCL8/MRC1/HCK/IRF8/TLR2/WNT5A/NLRC5/GBP5/CCL19/CASP1/IL12RB1/CCL21/CCL11/CCL24
GO:0050921	positive regulation of chemotaxis	0.000524808	0.00632588	15	CCL4/CX3CR1/CSF1R/PLA2G7/C3AR1/SMOC2/CCR1/C5AR1/CXCR4/RAC2/WNT5A/CCL19/CCL21/PRKD1/NCKAP1L
GO:0034612	response to tumor necrosis factor	0.000546084	0.00656555	22	CCL4/COL1A1/CCL8/CD14/LAPTM5/CCDC3/PYCARD/TNFSF13B/PTGS2/TNFRSF1B/PID1/GGT5/TNF/CCL19/CASP1/SYK/CCL21/CCL11/CCL24/PLVAP/TNFRSF17/KAT2A
GO:0002534	cytokine production involved in inflammatory response	0.000556634	0.00665158	10	PYCARD/TNF/GBP5/NOD2/ABCD1/APPL2/LILRB4/ALOX5/CLEC7A/MYD88
GO:1900015	regulation of cytokine production involved in inflammatory response	0.000556634	0.00665158	10	PYCARD/TNF/GBP5/NOD2/ABCD1/APPL2/LILRB4/ALOX5/CLEC7A/MYD88
GO:0002923	regulation of humoral immune response mediated by circulating immunoglobulin	0.000557474	0.00665158	5	FCGR2B/TNF/PTPRC/NOD2/PTPN6
GO:2000377	regulation of reactive oxygen species metabolic process	0.000560113	0.00666619	16	PLCG2/TYROBP/CD36/FBLN5/ITGAM/ITGB2/RAC2/PID1/TNF/BST1/ABCD1/SYK/ALOX5/BMP7/ROMO1/CLEC7A
GO:0050729	positive regulation of inflammatory response	0.000565643	0.00671505	15	PLCG2/C3/IL1B/PLA2G7/TLR2/IL33/BTK/PTGS2/WNT5A/TNF/TSLP/PIK3CG/CCL24/FEM1A/VAMP8
GO:0090218	positive regulation of lipid kinase activity	0.000570358	0.00673918	7	FGR/LYN/NOD2/FLT3/CCL19/CCL21/PRKD1
GO:0006874	cellular calcium ion homeostasis	0.000570889	0.00673918	33	PLCG2/CX3CR1/CD52/CD36/CCL8/C3AR1/FPR3/GPR65/CCR1/C5AR1/GPR18/CXCR4/CD24/LYN/OXTR/CCR5/P2RX5/WNT5A/TCIRG1/CORO1A/GNA15/LPAR1/TMEM38B/PTPRC/PTPN6/CCL19/CCL21/CCL11/PIK3CG/PRKD1/TRPM4/ATP7B/LCK
GO:0090199	regulation of release of cytochrome c from mitochondria	0.000571965	0.00673918	8	IGF1/CLU/PYCARD/MMP9/BID/PLAUR/ARRB2/PPIF
GO:0071624	positive regulation of granulocyte chemotaxis	0.000574404	0.00675104	6	C3AR1/C5AR1/RAC2/CCL19/CCL21/NCKAP1L
GO:0008630	intrinsic apoptotic signaling pathway in response to DNA damage	0.000579157	0.00678997	12	BCL2A1/SFRP2/MAEL/CD44/CLU/PYCARD/TNFRSF1B/TNF/BID/MUC1/TOPORS/MSH2
GO:0033674	positive regulation of kinase activity	0.000583275	0.00682128	34	IGF1/IL1B/CSF1R/TNFSF15/FGR/CLU/CD86/CD24/NRG3/RASSF2/LYN/CCND2/ADRA2A/WNT5A/TNF/CD300A/RASGRP1/PTPRC/NOD2/FLT3/CCL19/AXL/SYK/CCL21/FGD2/PIK3CG/PRKD1/EPHA7/EPHA4/IRAK1/NCKAP1L/LCP2/PPP1R9A/CCNT1
GO:0070304	positive regulation of stress-activated protein kinase signaling cascade	0.000602771	0.00703183	14	IL1B/IGFBP6/PYCARD/FCGR2B/RASSF2/LYN/WNT5A/TNF/RASGRP1/NOD2/CCL19/CCL21/CLEC7A/MYD88
GO:0038061	NIK/NF-kappaB signaling	0.000609157	0.00708878	15	IL1B/CD14/LAPTM5/TLR2/TNFSF15/CD86/RASSF2/TNF/NOD2/NR3C2/CCL19/HAVCR2/IRAK1/BMP7/UACA
GO:0050848	regulation of calcium-mediated signaling	0.00062232	0.00722412	10	CCL4/PLCG2/IGF1/PLEK/P2RX5/TNF/BST1/SYK/TBC1D10C/CLEC7A
GO:0002604	regulation of dendritic cell antigen processing and presentation	0.000666076	0.00765663	4	FCGR2B/NOD2/CCL19/CCL21
GO:0032493	response to bacterial lipoprotein	0.000666076	0.00765663	4	CD36/TLR1/CD14/TLR2
GO:0051798	positive regulation of hair follicle development	0.000666076	0.00765663	4	KRT17/WNT5A/TNF/HPSE
GO:1900227	positive regulation of NLRP3 inflammasome complex assembly	0.000666076	0.00765663	4	PLCG2/CD36/GBP5/MYD88
GO:0002478	antigen processing and presentation of exogenous peptide antigen	0.000675347	0.00774431	7	IFI30/CTSV/FCER1G/CTSS/FCGR2B/CLEC4A/HLA-DOB
GO:0002313	mature B cell differentiation involved in immune response	0.000706602	0.00800533	6	PLCG2/IRF8/DOCK11/FCGR2B/GPR183/CDH17
GO:0002675	positive regulation of acute inflammatory response	0.000706602	0.00800533	6	C3/IL1B/BTK/PTGS2/TNF/PIK3CG
GO:0010575	positive regulation of vascular endothelial growth factor production	0.000706602	0.00800533	6	C3/IL1B/C3AR1/C5AR1/PTGS2/HPSE
GO:0061082	myeloid leukocyte cytokine production	0.000706602	0.00800533	6	PLCG2/CD36/LAPTM5/WNT5A/LILRB1/TGFB3
GO:1902624	positive regulation of neutrophil migration	0.000706602	0.00800533	6	C3AR1/C5AR1/RAC2/CCL19/CCL21/NCKAP1L
GO:0002281	macrophage activation involved in immune response	0.000731861	0.00819302	5	PLCG2/CX3CR1/TYROBP/SYK/HAVCR2
GO:0002888	positive regulation of myeloid leukocyte mediated immunity	0.000731861	0.00819302	5	C3/TYROBP/ITGAM/ITGB2/BTK
GO:0042474	middle ear morphogenesis	0.000731861	0.00819302	5	TSHZ1/SIX2/PRRX1/PRKRA/NAGLU
GO:0048245	eosinophil chemotaxis	0.000731861	0.00819302	5	CCL4/CCL8/CCL21/CCL11/CCL24
GO:2001185	regulation of CD8-positive, alpha-beta T cell activation	0.000731861	0.00819302	5	CRTAM/LILRB1/RUNX3/LILRB4/NCKAP1L
GO:0046638	positive regulation of alpha-beta T cell differentiation	0.000758614	0.00845236	8	CD86/SASH3/RUNX3/CCL19/IL12RB1/SYK/LILRB4/NCKAP1L
GO:0060337	type I interferon signaling pathway	0.000758614	0.00845236	8	WNT5A/SAMHD1/NLRC5/MMP12/PTPN6/IRAK1/MYD88/TTLL12
GO:0034121	regulation of toll-like receptor signaling pathway	0.000772958	0.00859187	10	CD36/TLR1/TLR2/LYN/CD300LF/CD300A/NOD2/APPL2/ARRB2/LILRA2
GO:0110053	regulation of actin filament organization	0.000783317	0.00868652	23	TACSTD2/HCK/GPR65/HCLS1/PLEK/PYCARD/CORO1A/PLEKHH2/CAPG/LPAR1/AP1AR/COTL1/CCL21/TGFB3/CCL11/ARPC1B/TPM1/CCL24/ARFIP2/NCKAP1L/PPP1R9A/TTC8/PAK3
GO:0002702	positive regulation of production of molecular mediator of immune response	0.000804419	0.0088996	13	PLCG2/IL1B/CD36/LAPTM5/CD86/SASH3/WNT5A/LILRB1/PTPRC/NOD2/MSH2/CLEC7A/GPI
GO:1903531	negative regulation of secretion by cell	0.000812887	0.00897221	15	IL1B/UCP2/CHGA/FCGR2B/ADRA2A/TNFRSF1B/CD300A/LILRB1/SYTL4/CD84/NCKAP1L/PPP1R9A/VAMP8/CD200/RAB33B
GO:0046330	positive regulation of JNK cascade	0.000822801	0.00906042	11	IL1B/PYCARD/FCGR2B/RASSF2/WNT5A/TNF/RASGRP1/NOD2/CCL19/CCL21/MYD88
GO:0032720	negative regulation of tumor necrosis factor production	0.000858829	0.0094351	10	IGF1/GPR18/LILRB1/CLEC4A/NOD2/PTPN6/AXL/ARRB2/HAVCR2/CD33
GO:0002862	negative regulation of inflammatory response to antigenic stimulus	0.000861151	0.00943861	6	HCK/FGR/FCGR2B/LYN/NOD2/SYK
GO:0010466	negative regulation of peptidase activity	0.000870823	0.00952248	22	COL6A3/C3/SFRP2/SERPINF1/WFDC2/CSTA/CD44/SERPINB2/PTGS2/MMP9/DHCR24/TNF/CST6/RARRES1/TNFAIP8/LAMP3/PLAUR/ARRB2/MICAL1/SIMC1/CSTB/GPI
GO:0045860	positive regulation of protein kinase activity	0.000885841	0.00966428	29	IGF1/IL1B/CSF1R/TNFSF15/CLU/CD86/CD24/NRG3/RASSF2/CCND2/ADRA2A/WNT5A/TNF/CD300A/RASGRP1/PTPRC/NOD2/FLT3/CCL19/SYK/CCL21/FGD2/PIK3CG/EPHA4/IRAK1/NCKAP1L/LCP2/PPP1R9A/CCNT1
GO:0055074	calcium ion homeostasis	0.000897336	0.00976707	33	PLCG2/CX3CR1/CD52/CD36/CCL8/C3AR1/FPR3/GPR65/CCR1/C5AR1/GPR18/CXCR4/CD24/LYN/OXTR/CCR5/P2RX5/WNT5A/TCIRG1/CORO1A/GNA15/LPAR1/TMEM38B/PTPRC/PTPN6/CCL19/CCL21/CCL11/PIK3CG/PRKD1/TRPM4/ATP7B/LCK
